# Supplementary material
Source: Research Square preprint supplement (doi:10.21203/rs.3.rs-9152161/v1)
Supplement: Supplementary file 1 [file e293f68587f8880329fe1e3e.xlsx]

## Sheet: Sheet1
Tip industrije	OC_1	OC_2	OC_3	OC_4	OC_5	OC_6	STG_1	STG_2	STG_3	TI_1	TI_2	TI_3	TI_4	LC_1	LC_2	LC_3	LC_4	LC_5	TR_1	TR_2	TR_3	KM_1	KM_2	KM_3	KM_4	KM_5	KM_6	KM_7	KM_8	OP_1	OP_2	OP_3	OP_4	OP_5	OP_6
1	7	5	6	5	7	6	7	7	6	7	6	6	7	6	6	6	6	6	6	6	6	6	6	6	6	6	6	6	7	7	7	7	7	7	7
1	7	5	6	5	7	6	7	7	6	7	6	6	7	6	6	6	6	6	6	7	6	6	6	6	6	6	6	6	7	7	7	7	7	7	7
1	7	5	6	5	7	6	7	7	6	7	6	6	7	6	6	6	6	6	6	6	6	6	6	6	6	6	6	6	7	7	7	7	7	7	7
1	7	5	6	5	7	6	7	7	6	7	6	6	7	6	6	6	6	6	6	6	6	6	6	6	6	6	6	6	7	7	7	7	7	7	7
1	7	5	6	5	7	6	7	7	6	7	6	6	7	6	6	6	6	6	6	6	6	6	6	6	6	6	6	6	7	7	7	7	7	7	7
1	7	5	6	5	7	6	7	7	6	7	6	6	7	6	6	6	6	6	6	6	6	6	6	6	6	6	6	6	7	7	7	7	7	7	7
1	7	5	6	5	7	6	7	7	6	7	6	6	7	6	6	6	6	6	6	7	6	6	6	6	6	6	6	6	7	7	7	7	7	7	7
1	7	5	6	5	7	6	7	7	6	7	6	6	7	6	6	6	6	6	6	6	6	6	6	6	6	6	6	6	7	7	7	7	7	7	7
1	7	5	6	5	7	6	7	7	6	7	6	6	7	6	6	6	6	6	6	6	6	6	6	6	6	6	6	6	7	7	7	7	7	7	7
1	7	5	6	5	7	6	7	7	6	7	6	6	7	6	6	6	6	6	6	5	6	6	6	6	6	6	6	6	7	7	7	7	7	7	7
1	7	5	6	5	7	6	7	7	6	7	6	6	7	6	6	6	6	6	6	6	6	6	6	6	6	6	6	6	7	7	7	7	7	7	7
1	7	5	6	5	7	6	7	7	6	7	6	6	7	6	6	6	6	6	6	6	6	6	6	6	6	6	6	6	7	7	7	7	7	7	7
2	5	5	5	5	5	3	5	4	5	5	5	5	5	5	5	5	6	5	5	5	6	5	5	6	3	3	5	3	5	5	5	5	5	5	5
1	7	7	6	6	6	6	7	7	6	7	7	7	6	7	7	6	6	7	6	6	7	7	7	6	7	7	7	7	7	7	7	7	7	7	7
1	7	7	6	6	6	6	7	7	6	7	7	7	6	7	7	6	6	7	6	6	7	7	7	6	7	7	7	7	7	7	7	7	7	7	7
1	7	7	6	6	6	6	7	7	6	7	7	7	6	7	7	6	6	7	6	6	7	7	7	6	7	7	7	7	7	7	7	7	7	7	7
2	5	5	3	5	3	3	5	4	4	5	6	6	6	5	6	6	6	6	6	6	6	6	6	6	6	6	6	6	6	5	6	6	6	6	6
1	7	4	5	7	4	5	5	4	7	4	3	6	5	6	6	5	5	5	6	6	5	6	6	6	7	5	6	5	7	6	6	6	6	6	6
1	7	4	5	7	4	5	5	4	7	4	3	6	5	6	6	5	5	5	6	6	5	6	6	6	7	5	6	5	7	6	6	6	6	6	6
1	7	4	5	7	4	5	5	4	7	4	3	6	5	6	6	5	5	5	6	6	5	6	6	6	7	5	6	5	7	6	6	6	6	6	6
1	7	4	5	7	4	5	5	4	7	4	3	6	5	6	6	5	5	5	6	6	5	6	6	6	7	5	6	5	7	6	6	6	6	6	6
1	7	4	5	7	4	5	5	4	7	4	3	6	5	6	6	5	5	5	6	6	5	6	6	6	7	5	6	5	7	6	6	6	6	6	6
1	7	4	5	7	4	5	5	4	7	4	3	6	5	6	6	5	5	5	6	5	5	6	6	6	7	5	6	5	7	6	6	6	6	6	6
1	7	4	5	7	4	5	5	4	7	4	3	6	5	6	6	5	5	5	6	6	5	6	6	6	7	5	6	5	7	6	6	6	6	6	6
1	7	4	5	7	4	5	5	4	7	4	3	6	5	6	6	5	5	5	6	6	5	6	6	6	7	5	6	5	7	6	6	6	6	6	6
1	7	4	5	7	4	5	6	4	7	4	3	6	5	6	6	5	5	5	6	6	5	6	6	6	7	5	6	5	7	6	6	6	6	6	6
2	6	6	6	6	6	6	6	6	6	6	6	6	3	6	7	6	6	6	6	6	6	6	5	6	6	5	6	6	6	6	6	6	6	6	6
1	4	2	1	3	4	1	4	4	4	3	3	3	3	3	1	4	5	4	3	3	3	3	3	3	4	4	4	4	3	4	4	4	4	4	4
1	5	6	5	5	5	5	6	6	4	6	6	6	6	5	5	5	5	7	6	6	6	6	6	3	6	6	6	6	6	7	7	6	6	6	6
1	7	6	5	6	6	6	7	6	6	7	7	7	6	7	7	6	5	7	6	6	7	7	7	6	7	7	7	7	7	6	7	7	7	7	7
1	7	6	5	6	6	6	7	6	6	7	7	7	6	7	7	6	5	7	6	6	7	7	7	6	7	7	7	7	7	6	7	7	7	7	7
1	7	6	5	6	6	6	7	6	6	7	7	7	6	7	7	6	5	7	6	6	7	7	7	6	7	7	7	7	7	6	7	7	7	7	7
1	7	6	5	7	6	6	7	6	6	7	7	7	6	7	7	6	5	7	6	6	7	7	7	6	7	7	7	7	7	6	7	7	7	7	7
1	7	6	5	7	6	6	7	6	6	7	7	7	6	7	7	6	5	7	6	6	7	7	7	6	7	7	7	7	7	6	7	7	7	7	7
1	7	6	5	7	6	6	7	6	6	7	7	7	6	7	7	6	5	7	6	6	7	7	7	6	7	7	7	7	7	6	7	7	7	7	7
2	4	6	5	6	5	5	6	4	5	5	6	6	6	5	5	6	5	2	7	6	7	6	7	6	4	3	4	5	5	6	6	5	5	5	5
1	7	7	6	7	7	6	6	6	4	4	7	7	6	7	7	6	5	7	4	4	6	6	6	4	4	7	7	7	7	7	7	6	7	7	7
1	7	7	6	7	7	6	6	6	4	4	7	7	6	7	7	6	5	7	4	5	6	6	6	4	4	7	7	7	7	7	7	6	7	7	7
1	7	7	6	7	7	6	6	6	4	4	7	7	6	7	7	6	5	7	4	4	6	6	6	4	4	7	7	7	7	7	7	6	7	7	7
1	6	6	7	6	6	6	6	6	7	6	7	6	7	7	6	7	7	7	7	7	7	6	7	6	6	7	7	7	6	7	7	7	7	7	6
1	6	6	7	6	6	6	6	6	7	6	7	6	7	7	6	7	7	7	7	7	7	6	7	6	6	7	7	7	6	7	7	7	7	7	6
1	6	6	7	6	6	6	6	6	7	6	7	6	7	7	6	7	7	7	7	7	7	6	7	6	6	7	7	7	6	7	7	7	7	7	6
1	7	7	5	6	7	7	5	6	7	7	6	6	5	6	5	6	6	6	6	6	6	6	6	5	6	5	5	6	5	6	6	6	6	6	6
1	7	7	5	6	7	7	5	6	7	7	6	6	5	6	5	6	6	6	6	6	6	6	6	5	6	5	5	6	5	6	6	6	6	6	6
1	6	5	6	6	5	6	7	6	7	4	4	6	4	7	7	6	6	6	6	6	6	5	5	6	7	4	5	6	6	7	7	7	7	7	7
1	6	5	6	6	5	6	7	6	7	4	4	6	4	7	7	6	6	6	6	7	6	5	5	6	7	4	5	6	6	7	7	7	7	7	7
1	6	5	6	6	5	6	7	6	7	4	4	6	4	7	7	6	6	6	6	6	6	5	5	6	7	4	5	6	6	7	7	7	7	7	7
1	6	5	6	6	5	6	7	6	7	4	4	6	4	7	7	6	6	6	6	6	6	5	5	6	7	4	5	6	6	7	7	7	7	7	7
1	6	5	6	6	5	6	7	6	7	4	4	6	4	7	7	6	6	6	6	6	6	5	5	6	7	4	5	6	6	7	7	7	7	7	7
1	6	5	6	6	5	6	7	6	7	4	4	6	4	7	7	6	6	6	6	6	6	5	5	6	7	4	5	6	6	7	7	7	7	7	7
1	6	5	6	6	5	6	7	6	7	4	4	6	4	7	7	6	6	6	6	7	6	5	5	6	7	4	5	6	6	7	7	7	7	7	7
1	6	5	6	6	5	6	7	6	7	4	4	6	4	7	7	6	6	6	6	6	6	5	5	6	7	4	5	6	6	7	7	7	7	7	7
1	6	5	6	6	5	6	7	6	7	4	4	6	4	7	7	6	6	6	6	6	6	5	5	6	7	4	5	6	6	7	7	7	7	7	7
2	5	6	6	6	6	6	6	6	5	6	6	6	6	5	7	6	6	6	6	6	4	6	4	6	6	4	6	6	6	6	6	6	6	6	6
2	5	6	6	5	4	5	5	5	4	4	4	3	3	6	6	6	6	6	6	6	3	5	6	5	5	5	5	6	6	7	6	6	6	6	6
2	5	6	6	5	4	5	5	3	5	3	3	3	3	6	6	6	6	6	6	6	3	5	6	5	5	5	5	6	6	7	6	6	6	6	6
1	5	5	5	4	5	4	4	4	4	4	2	3	3	4	4	4	5	5	5	5	5	4	4	4	4	4	5	5	4	4	5	4	4	5	4
1	5	5	5	4	5	4	3	3	4	4	2	3	3	4	4	4	5	5	5	5	5	4	4	4	4	4	5	5	4	4	5	4	4	5	4
2	7	7	7	6	7	5	6	5	5	6	6	5	5	6	6	6	6	7	6	6	7	6	6	6	5	5	5	4	5	6	6	6	5	6	5
2	5	5	5	5	4	5	5	3	4	4	5	5	5	5	5	5	5	6	5	5	5	4	5	5	5	4	5	5	5	5	5	5	5	6	6
1	7	7	7	7	7	7	7	6	7	5	3	3	3	7	7	7	7	7	7	7	7	5	5	6	7	7	7	7	7	7	7	6	6	6	7
2	7	7	7	6	7	6	6	6	5	6	6	6	6	6	6	6	6	6	5	5	5	6	6	6	5	5	5	4	5	6	6	6	6	5	5
1	7	7	7	7	7	7	6	6	5	6	7	6	6	6	6	7	7	6	7	7	5	6	5	6	5	5	5	7	7	7	7	7	7	6	6
1	6	6	7	6	7	7	6	6	6	6	7	6	6	4	4	7	6	6	7	7	7	6	7	6	6	7	7	7	7	6	6	7	6	6	6
1	6	6	7	6	7	7	6	6	6	6	7	6	6	4	4	7	6	6	7	7	7	6	7	6	6	7	7	7	7	6	6	7	6	6	6
1	6	6	7	6	7	7	6	6	6	6	7	6	6	4	4	7	6	6	7	7	7	6	7	6	6	7	7	7	7	6	6	7	6	6	6
1	6	7	7	6	7	7	5	7	5	5	5	7	5	7	7	6	6	7	7	7	7	6	6	6	7	5	7	7	4	7	7	6	7	7	7
2	3	3	3	3	3	3	5	5	5	5	5	5	5	5	5	5	3	3	5	5	5	3	3	2	3	3	2	3	3	5	5	6	6	6	5
1	6	7	6	6	4	6	6	7	7	7	7	7	7	6	6	6	7	6	6	6	3	6	6	6	6	6	7	7	7	6	6	7	7	7	7
1	6	5	5	5	6	6	5	4	6	5	5	5	5	5	5	5	5	5	6	6	5	5	5	4	5	5	6	5	6	6	6	5	5	5	5
2	6	6	6	6	7	7	6	4	6	6	6	6	4	6	6	6	6	6	6	6	6	6	6	5	3	3	3	6	6	6	6	6	5	5	5
1	6	6	5	5	6	6	7	5	6	6	6	6	7	5	6	5	6	7	6	6	7	6	6	5	7	5	5	6	6	6	6	7	6	6	7
1	6	6	5	5	6	6	7	5	6	6	6	6	7	5	6	5	6	7	6	6	7	6	6	5	7	5	5	6	6	6	6	7	6	6	7
1	6	6	5	5	6	6	7	5	6	6	6	6	7	5	6	5	6	7	6	6	7	6	6	5	7	5	5	6	6	6	6	7	6	6	7
1	6	5	6	5	6	5	6	6	5	6	6	6	6	5	6	6	6	6	6	6	6	6	6	6	6	6	6	6	6	7	7	6	7	7	6
1	6	7	6	7	7	6	6	6	5	5	5	5	4	7	6	7	7	5	7	7	6	6	5	6	6	5	7	7	7	7	7	7	7	6	6
1	6	7	6	7	7	6	6	6	5	5	5	5	4	7	6	7	7	5	7	7	6	6	5	6	6	5	7	7	7	7	7	7	7	6	6
1	6	7	6	7	7	6	6	6	5	5	5	5	4	7	6	7	7	5	7	7	6	6	5	6	6	5	7	7	7	7	7	7	7	6	6
1	6	6	6	6	4	5	6	3	6	5	4	6	6	6	6	6	6	6	7	7	4	6	6	6	4	4	6	5	6	7	7	7	7	7	7
1	7	6	4	6	6	5	6	6	6	6	6	7	6	6	6	6	6	5	6	6	5	6	5	5	6	6	6	6	6	7	7	7	7	6	6
1	7	6	4	6	6	5	6	6	6	6	6	7	6	6	6	6	6	5	6	6	5	6	5	5	6	6	6	6	6	7	7	7	7	6	6
1	7	6	4	6	6	5	6	6	6	6	6	7	6	6	6	6	6	5	6	6	5	6	5	5	6	6	6	6	6	7	7	7	7	6	6
1	7	6	4	6	6	5	6	6	6	6	6	7	6	6	6	6	6	5	6	6	5	6	5	5	6	6	6	6	6	7	7	7	7	6	6
1	7	6	4	6	6	5	6	6	6	6	6	7	6	6	6	6	6	5	6	6	5	6	5	5	6	6	6	6	6	7	7	7	7	6	6
1	7	6	4	6	6	5	6	6	6	6	6	7	6	6	6	6	6	5	6	6	5	6	5	5	6	6	6	6	6	7	7	7	7	6	6
1	7	6	4	6	6	5	6	6	6	6	6	7	6	6	6	6	6	5	6	6	5	6	5	5	6	6	6	6	6	7	7	7	7	6	6
1	7	6	4	6	6	5	6	6	6	6	6	7	6	6	6	6	6	5	6	6	5	6	5	5	6	6	6	6	6	7	7	7	7	6	6
1	7	6	4	6	6	5	6	6	6	6	6	7	6	6	6	6	6	5	6	6	5	6	5	5	6	6	6	6	6	7	7	7	7	6	6
1	7	6	4	6	6	5	6	6	6	6	6	7	6	6	6	6	6	5	6	6	5	6	5	5	6	6	6	6	6	7	7	7	7	6	6
1	7	6	4	6	6	5	6	6	6	6	6	7	6	6	6	6	6	5	6	6	5	6	5	5	6	6	6	6	6	7	7	7	7	6	6
1	7	6	4	6	6	5	6	6	6	6	6	7	6	6	6	6	6	5	6	6	5	6	5	5	6	6	6	6	6	7	7	7	7	6	6
1	7	6	4	6	6	5	6	6	6	6	6	7	6	6	6	6	6	5	6	6	5	6	5	5	6	6	6	6	6	7	7	7	7	6	6
1	7	6	4	6	6	5	6	6	6	6	6	7	6	6	6	6	6	5	6	6	5	6	5	5	6	6	6	6	6	7	7	7	7	6	6
1	7	6	4	6	6	5	6	6	6	6	6	7	6	6	6	6	6	5	6	6	5	6	5	5	6	6	6	6	6	7	7	7	7	6	6
1	7	6	4	6	6	5	6	6	6	6	6	7	6	6	6	6	6	5	6	6	5	6	5	5	6	6	6	6	6	7	7	7	7	6	6
1	7	6	4	6	6	5	6	6	6	6	6	7	6	6	6	6	6	5	6	6	5	6	5	5	6	6	6	6	6	7	7	7	7	6	6
1	7	6	4	6	6	5	6	6	6	6	6	7	6	6	6	6	6	5	6	6	5	6	5	5	6	6	6	6	6	7	7	7	7	6	6
1	7	6	4	6	6	5	6	6	6	6	6	7	6	6	6	6	6	5	6	6	5	6	5	5	6	6	6	6	6	7	7	7	7	6	6
1	7	6	4	6	6	5	6	6	6	6	6	7	6	6	6	6	6	5	6	6	5	6	5	5	6	6	6	6	6	7	7	7	7	6	6
1	7	6	4	6	6	5	6	6	6	6	6	7	6	6	6	6	6	5	6	6	5	6	5	5	6	6	6	6	6	7	7	7	7	6	6
1	7	6	4	6	6	5	6	6	6	6	6	7	6	6	6	6	6	5	6	6	5	6	5	5	6	6	6	6	6	7	7	7	7	6	6
1	7	6	4	6	6	5	6	6	6	6	6	7	6	6	6	6	6	5	6	6	5	6	5	5	6	6	6	6	6	7	7	7	7	6	6
1	7	6	4	6	6	5	6	6	6	6	6	7	6	6	6	6	6	5	6	6	5	6	5	5	6	6	6	6	6	7	7	7	7	6	6
1	6	7	6	5	7	6	7	7	7	7	6	6	7	5	6	6	4	4	6	6	6	6	6	7	7	6	6	7	5	6	6	7	6	6	6
1	6	7	6	5	7	6	7	7	7	7	6	6	7	5	6	6	4	4	6	6	6	6	6	7	7	6	6	7	5	6	6	7	6	6	6
1	6	7	6	5	7	6	7	7	7	7	6	6	7	5	6	6	4	4	6	6	6	6	6	7	7	6	6	7	5	6	6	7	6	6	6
1	6	7	6	5	7	6	7	7	7	7	6	6	7	5	6	6	4	4	6	6	6	6	6	7	7	6	6	7	5	6	6	7	6	6	6
1	6	7	6	5	7	6	7	7	7	7	6	6	7	5	6	6	4	4	6	6	6	6	6	7	7	6	6	7	5	6	6	7	6	6	6
1	6	7	6	5	7	6	7	7	7	7	6	6	7	5	6	6	4	4	6	6	6	6	6	7	7	6	6	7	5	6	6	7	6	6	6
1	6	7	6	5	7	6	7	7	7	7	6	6	7	5	6	6	4	4	6	6	6	6	6	7	7	6	6	7	5	6	6	7	6	6	6
1	6	7	6	5	7	6	7	7	7	7	6	6	7	5	6	6	4	4	6	6	6	6	6	7	7	6	6	7	5	6	6	7	6	6	6
1	6	7	6	5	7	6	7	7	7	7	6	6	7	5	6	6	4	4	6	6	6	6	6	7	7	6	6	7	5	6	6	7	6	6	6
1	6	7	6	5	7	6	7	7	7	7	6	6	7	5	6	6	4	4	6	6	6	6	6	7	7	6	6	7	5	6	6	7	6	6	6
1	6	7	6	5	7	6	7	7	7	7	6	6	7	5	6	6	4	4	6	6	6	6	6	7	7	6	6	7	5	6	6	7	6	6	6
1	6	7	6	5	7	6	7	7	7	7	6	6	7	5	6	6	4	4	6	6	6	6	6	7	7	6	6	7	5	6	6	7	6	6	6
1	6	7	6	5	7	6	7	7	7	7	6	6	7	5	6	6	4	4	6	6	6	6	6	7	7	6	6	7	5	6	6	7	6	6	6
1	6	7	6	5	7	6	7	7	7	7	6	6	7	5	6	6	4	4	6	6	6	6	6	7	7	6	6	7	5	6	6	7	6	6	6
1	6	7	6	5	7	6	7	7	7	7	6	6	7	5	6	6	4	4	6	6	6	6	6	7	7	6	6	7	5	6	6	7	6	6	6
1	7	7	6	6	6	7	6	7	7	6	6	6	7	7	6	7	7	7	7	7	7	6	6	7	7	6	7	7	6	7	7	7	6	6	6
1	7	7	6	6	6	7	6	7	7	6	6	6	7	7	6	7	7	7	7	7	7	6	6	7	7	6	7	7	6	7	7	7	6	6	6
1	7	7	6	6	6	7	6	7	7	6	6	6	7	7	6	7	7	7	7	7	7	6	6	7	7	6	7	7	6	7	7	7	6	6	6
1	6	7	6	7	6	6	6	7	6	7	7	6	6	7	7	6	7	7	6	6	6	6	7	7	6	7	7	7	6	7	6	7	6	6	7
1	6	7	6	7	6	6	6	7	6	7	7	6	6	7	7	6	7	7	6	6	6	6	7	7	6	7	7	7	6	7	6	7	6	6	7
1	6	7	6	7	6	6	6	7	6	7	7	6	6	7	7	6	7	7	6	6	6	6	7	7	6	7	7	7	6	7	6	7	6	6	7
1	6	7	6	7	6	6	6	7	6	7	7	6	6	7	7	6	7	7	6	6	6	6	7	7	6	7	7	7	6	7	6	7	6	6	7
1	6	7	6	7	6	6	6	7	6	7	7	6	6	7	7	6	7	7	6	6	6	6	7	7	6	7	7	7	6	7	6	7	6	6	7
1	6	7	6	7	6	6	6	7	6	7	7	6	6	7	7	6	7	7	6	6	6	6	7	7	6	7	7	7	6	7	6	7	6	6	7
1	6	7	6	7	6	6	6	7	6	7	7	6	6	7	7	6	7	7	6	6	6	6	7	7	6	7	7	7	6	7	6	7	6	6	7
1	6	7	6	7	6	6	6	7	6	7	7	6	6	7	7	6	7	7	6	6	6	6	7	7	6	7	7	7	6	7	6	7	6	6	7
1	6	7	6	7	6	6	6	7	6	7	7	6	6	7	7	6	7	7	6	6	6	6	7	7	6	7	7	7	6	7	6	7	6	6	7
1	7	6	7	6	6	7	6	4	6	5	6	6	4	7	7	5	6	4	6	6	6	5	6	6	7	5	6	7	7	7	6	7	6	7	7
1	7	6	7	6	6	7	6	4	6	5	6	6	4	7	7	5	6	4	6	6	6	5	6	6	7	5	6	7	7	7	6	7	6	7	7
1	7	6	7	6	6	7	6	4	6	5	6	6	4	7	7	5	6	4	6	6	6	5	6	6	7	5	6	7	7	7	6	7	6	7	7
1	4	3	5	5	5	6	6	4	5	5	5	5	5	5	5	4	5	5	5	5	4	5	5	4	5	5	5	6	5	5	6	6	5	6	5
1	6	7	6	7	7	7	7	7	7	7	5	7	6	7	6	7	7	6	7	7	7	6	6	7	6	7	7	5	6	7	7	6	7	7	6
2	2	3	3	3	3	3	3	3	2	4	4	4	3	3	5	3	6	5	3	3	3	4	4	4	5	3	5	3	3	2	2	2	2	3	3
2	6	7	7	5	7	6	6	5	6	6	6	6	5	6	6	5	5	5	6	6	6	5	5	6	5	5	5	5	6	6	6	7	6	6	6
1	5	5	6	4	3	4	4	5	6	3	3	6	6	5	5	3	4	4	5	5	5	6	5	6	6	5	4	6	5	5	6	6	5	5	5
2	3	2	5	4	3	2	6	4	7	5	5	6	6	7	6	5	6	5	6	6	3	5	6	7	4	6	5	5	6	7	6	6	7	6	5
2	5	5	5	5	5	5	4	4	4	3	2	2	2	5	5	6	5	5	5	5	5	5	5	3	5	5	5	5	5	4	4	4	4	4	4
1	6	5	7	6	5	7	5	6	6	6	6	6	7	5	4	5	5	6	7	7	6	6	6	7	7	6	6	6	6	7	7	6	7	6	6
1	6	5	7	6	5	7	5	6	6	6	6	6	7	5	4	5	5	6	7	7	6	6	6	7	7	6	6	6	6	7	7	6	7	6	6
1	6	5	7	6	5	7	5	6	6	6	6	6	7	5	4	5	5	6	7	7	6	6	6	7	7	6	6	6	6	7	7	6	7	6	6
1	6	5	7	6	5	7	5	6	6	6	6	6	7	5	4	5	5	6	7	7	6	6	6	7	7	6	6	6	6	7	7	6	7	6	6
1	6	5	7	6	5	7	5	6	6	6	6	6	7	5	4	5	5	6	7	7	6	6	6	7	7	6	6	6	6	7	7	6	7	6	6
1	6	5	7	6	5	7	5	6	6	6	6	6	7	5	4	5	5	6	7	7	6	6	6	7	7	6	6	6	6	7	7	6	7	6	6
1	6	5	7	6	5	7	5	6	6	6	6	6	7	5	4	5	5	6	7	7	6	6	6	7	7	6	6	6	6	7	7	6	7	6	6
1	6	5	7	6	5	7	5	6	6	6	6	6	7	5	4	5	5	6	7	7	6	6	6	7	7	6	6	6	6	7	7	6	7	6	6
1	6	5	7	6	5	7	5	6	6	6	6	6	7	5	4	5	5	6	7	7	6	6	6	7	7	6	6	6	6	7	7	6	7	6	6
1	6	5	7	6	5	7	5	6	6	6	6	6	7	5	4	5	5	6	7	7	6	6	6	7	7	6	6	6	6	7	7	6	7	6	6
1	7	7	7	7	6	7	6	7	7	6	6	7	7	6	7	6	6	7	6	6	6	7	7	6	6	7	6	7	7	6	6	7	7	6	6
1	7	7	7	7	6	7	6	7	7	6	6	7	7	6	7	6	6	7	6	6	6	7	7	6	6	7	6	7	7	6	6	7	7	6	6
1	7	7	7	7	6	7	6	7	7	6	6	7	7	6	7	6	6	7	6	6	6	7	7	6	6	7	6	7	7	6	6	7	7	6	6
1	7	7	7	7	6	7	6	7	7	6	6	7	7	6	7	6	6	7	6	6	6	7	7	6	6	7	6	7	7	6	6	7	7	6	6
1	7	7	7	7	6	7	6	7	7	6	6	7	7	6	7	6	6	7	6	6	6	7	7	6	6	7	6	7	7	6	6	7	7	6	6
1	7	7	7	7	6	7	6	7	7	6	6	7	7	6	7	6	6	7	6	6	6	7	7	6	6	7	6	7	7	6	6	7	7	6	6
1	7	7	7	7	6	7	6	7	7	6	6	7	7	6	7	6	6	7	6	6	6	7	7	6	6	7	6	7	7	6	6	7	7	6	6
1	7	7	7	7	6	7	6	7	7	6	6	7	7	6	7	6	6	7	6	6	6	7	7	6	6	7	6	7	7	6	6	7	7	6	6
1	7	7	7	7	6	7	6	7	7	6	6	7	7	6	7	6	6	7	6	6	6	7	7	6	6	7	6	7	7	6	6	7	7	6	6
1	7	6	6	5	6	6	6	7	7	6	6	7	7	6	7	6	6	7	6	6	6	7	7	6	6	7	6	7	7	6	6	7	7	6	6
1	7	6	6	5	6	6	6	7	7	6	6	7	7	6	7	6	6	7	6	6	6	7	7	6	6	7	6	7	7	6	6	7	7	6	6
1	7	6	6	5	6	6	6	7	7	6	6	7	7	6	7	6	6	7	6	6	6	7	7	6	6	7	6	7	7	6	6	7	7	6	6
1	7	6	6	5	6	6	6	7	7	6	6	7	7	6	7	6	6	7	6	6	6	7	7	6	6	7	6	7	7	6	6	7	7	6	6
1	7	6	6	5	6	6	6	7	7	6	6	7	7	6	7	6	6	7	6	6	6	7	7	6	6	7	6	7	7	6	6	7	7	6	6
1	7	6	6	5	6	6	6	7	7	6	6	7	7	6	7	6	6	7	6	6	6	7	7	6	6	7	6	7	7	6	6	7	7	6	6
1	7	6	6	5	6	6	6	7	7	6	6	7	7	6	7	6	6	7	6	6	6	7	7	6	6	7	6	7	7	6	6	7	7	6	6
1	7	6	6	5	6	6	6	7	7	6	6	7	7	6	7	6	6	7	6	6	6	7	7	6	6	7	6	7	7	6	6	7	7	6	6
1	7	6	6	5	6	6	6	7	7	6	6	7	7	6	7	6	6	7	6	6	6	7	7	6	6	7	6	7	7	6	6	7	7	6	6
1	7	7	6	6	6	6	6	7	7	6	6	7	7	6	7	6	6	7	6	6	6	7	7	6	6	7	6	7	7	6	6	7	7	6	6
1	7	7	6	6	6	6	6	7	7	6	6	7	7	6	7	6	6	7	6	6	6	7	7	6	6	7	6	7	7	6	6	7	7	6	6
1	7	7	6	6	6	6	6	7	7	6	6	7	7	6	7	6	6	7	6	6	6	7	7	6	6	7	6	7	7	6	6	7	7	6	6
1	7	7	6	6	6	6	6	7	7	6	6	7	7	6	7	6	6	7	6	6	6	7	7	6	6	7	6	7	7	6	6	7	7	6	6
1	7	7	6	6	6	6	6	7	7	6	6	7	7	6	7	6	6	7	6	6	6	7	7	6	6	7	6	7	7	6	6	7	7	6	6
1	7	7	6	6	6	6	6	7	7	6	6	7	7	6	7	6	6	7	6	6	6	7	7	6	6	7	6	7	7	6	6	7	7	6	6
1	7	7	6	6	6	6	6	7	7	6	6	7	7	6	7	6	6	7	6	6	6	7	7	6	6	7	6	7	7	6	6	7	7	6	6
1	7	7	6	6	6	6	6	7	7	6	6	7	7	6	7	6	6	7	6	6	6	7	7	6	6	7	6	7	7	6	6	7	7	6	6
1	7	5	6	7	7	6	6	7	7	6	6	7	7	6	7	6	6	7	6	6	6	7	7	6	6	7	6	7	7	6	6	7	7	6	6
1	7	5	6	7	7	6	6	7	7	6	6	7	7	6	7	6	6	7	6	6	6	7	7	6	6	7	6	7	7	6	6	7	7	6	6
1	7	5	6	7	7	6	6	7	7	6	6	7	7	6	7	6	6	7	6	6	6	7	7	6	6	7	6	7	7	6	6	7	7	6	6
1	7	5	6	7	7	6	6	7	7	6	6	7	7	6	7	6	6	7	6	6	6	7	7	6	6	7	6	7	7	6	6	7	7	6	6
1	7	5	6	7	7	6	6	7	7	6	6	7	7	6	7	6	6	7	6	6	6	7	7	6	6	7	6	7	7	6	6	7	7	6	6
1	7	5	6	7	7	6	6	7	7	6	6	7	7	6	7	6	6	7	6	6	6	7	7	6	6	7	6	7	7	6	6	7	7	6	6
1	7	5	6	7	7	6	6	7	7	6	6	7	7	6	7	6	6	7	6	6	6	7	7	6	6	7	6	7	7	6	6	7	7	6	6
1	7	5	6	7	7	6	6	7	7	6	6	7	7	6	7	6	6	7	6	6	6	7	7	6	6	7	6	7	7	6	6	7	7	6	6
1	7	5	6	7	7	6	6	7	7	6	6	7	7	6	7	6	6	7	6	6	6	7	7	6	6	7	6	7	7	6	6	7	7	6	6
1	6	6	5	5	5	5	6	7	7	7	7	7	7	5	4	6	6	5	6	6	6	6	6	7	5	6	6	6	6	5	6	6	6	5	6
2	5	5	4	4	6	5	6	6	4	6	6	6	6	5	5	5	5	4	7	7	7	6	7	7	4	5	4	5	5	5	6	4	5	5	5
1	5	5	1	5	6	5	3	5	5	5	5	5	5	5	5	5	5	5	5	5	4	5	5	5	5	5	5	5	5	5	5	5	5	5	5
1	6	6	7	7	7	6	5	6	5	5	6	6	5	6	6	7	7	6	7	7	6	6	5	6	6	5	7	6	5	6	6	7	6	6	7
1	6	6	7	7	7	6	5	6	5	5	6	6	5	6	6	7	7	6	7	7	6	6	5	6	6	5	7	6	5	6	6	7	6	6	7
1	7	7	6	4	7	4	5	6	5	5	5	5	5	5	5	4	4	7	6	6	7	7	6	5	5	4	4	7	5	6	6	6	6	7	6
1	7	7	6	4	7	4	5	6	5	5	5	5	5	5	5	4	4	7	6	6	7	7	6	5	5	4	4	7	5	6	6	6	6	7	6
2	6	6	6	6	5	4	6	4	6	6	6	6	6	3	6	4	6	6	6	6	4	6	6	6	6	6	6	6	6	6	6	6	6	6	4
2	5	5	5	5	4	5	5	3	5	3	3	5	3	6	7	6	7	6	5	5	5	5	5	5	3	5	5	5	5	5	6	5	5	5	4
1	5	5	3	6	5	5	5	6	5	5	2	2	2	2	2	6	6	6	6	6	3	5	5	2	6	6	6	6	6	7	7	7	6	6	6
1	5	5	3	6	5	5	5	6	5	5	2	2	2	2	2	6	6	6	6	6	3	5	5	2	6	6	6	6	6	7	7	7	6	6	6
1	6	6	6	5	6	6	7	6	6	5	6	6	6	6	6	5	6	5	6	6	5	5	4	5	6	5	6	5	6	7	6	7	6	6	5
1	6	6	7	5	6	6	6	6	6	7	6	6	6	5	5	6	5	5	6	6	5	5	6	5	5	5	4	5	6	6	6	5	6	6	7
1	5	7	5	7	7	7	5	7	6	3	5	7	5	7	6	7	6	5	6	6	4	6	3	6	6	7	3	6	5	6	6	7	6	5	6
1	7	7	5	7	7	7	6	7	7	7	7	7	7	6	6	6	6	7	4	4	7	7	7	7	5	7	7	7	7	7	7	7	7	7	7
2	5	5	5	5	5	5	5	5	3	3	2	2	3	5	5	5	5	3	5	5	5	5	5	5	3	4	4	5	3	5	5	4	4	4	4
2	4	3	4	5	4	3	3	3	4	4	4	3	4	4	4	7	3	3	3	3	3	3	3	3	5	5	5	4	3	3	3	3	3	3	2
1	6	7	6	5	7	6	7	7	7	7	6	6	7	5	6	6	4	4	6	6	6	6	6	7	7	6	6	7	5	6	6	7	6	6	6
1	6	7	6	5	7	6	7	7	7	7	6	6	7	5	6	6	4	4	6	6	6	6	6	7	7	6	6	7	5	6	6	7	6	6	6
2	5	6	6	6	5	4	5	4	4	4	4	5	4	6	6	6	6	6	6	6	5	5	6	6	5	6	5	6	6	7	6	6	6	6	6
1	5	6	5	6	7	6	6	5	5	5	6	7	5	5	4	5	5	5	5	5	5	6	6	6	5	5	5	7	7	7	6	7	6	6	6
1	5	6	5	6	7	6	6	5	5	5	6	7	5	5	4	5	5	5	5	5	5	6	6	6	5	5	5	7	7	7	6	7	6	6	6
1	5	6	5	6	7	6	6	5	5	5	6	7	5	5	4	5	5	5	5	5	5	6	6	6	5	5	5	7	7	7	6	7	6	6	6
1	7	7	6	6	6	6	6	7	7	6	6	7	7	6	7	6	6	7	6	6	6	7	7	6	6	7	6	7	7	6	6	7	7	6	6
1	6	1	2	1	4	4	6	4	6	6	6	6	6	5	6	5	5	5	5	5	6	5	5	6	6	6	6	6	6	5	4	5	5	5	5
1	5	5	5	6	6	6	7	7	6	6	5	6	6	6	2	7	2	2	6	6	7	7	7	2	6	6	6	7	7	6	6	7	6	7	7
1	7	5	6	7	6	7	6	5	7	7	5	6	6	7	6	7	5	7	7	7	6	5	6	7	7	6	5	6	5	7	7	6	7	5	6
1	7	5	6	7	6	7	6	5	7	7	5	6	6	7	6	7	5	7	7	7	6	5	6	7	7	6	5	6	5	7	7	6	7	5	6
1	7	5	6	7	6	7	6	5	7	7	5	6	6	7	6	7	5	7	7	7	6	5	6	7	7	6	5	6	5	7	7	6	7	5	6
1	7	5	6	7	6	7	6	5	7	7	5	6	6	7	6	7	5	7	7	7	6	5	6	7	7	6	5	6	5	7	7	6	7	5	6
1	7	5	6	7	6	7	6	5	7	7	5	6	6	7	6	7	5	7	7	7	6	5	6	7	7	6	5	6	5	7	7	6	7	5	6
1	7	5	6	7	6	7	6	5	7	7	5	6	6	7	6	7	5	7	7	7	6	5	6	7	7	6	5	6	5	7	7	6	7	5	6
1	7	5	6	7	6	7	6	5	7	7	5	6	6	7	6	7	5	7	7	7	6	5	6	7	7	6	5	6	5	7	7	6	7	5	6
1	7	5	6	7	6	7	6	5	7	7	5	6	6	7	6	7	5	7	7	7	6	5	6	7	7	6	5	6	5	7	7	6	7	5	6
1	5	6	5	6	6	6	6	5	4	6	7	6	5	7	6	5	5	5	6	6	6	5	5	6	5	5	5	4	5	5	5	4	5	6	4
1	7	7	7	7	5	6	4	4	4	4	6	6	4	6	6	6	6	5	6	6	6	5	5	5	5	4	4	5	5	6	5	6	6	6	6
2	5	6	7	6	5	7	5	6	4	6	4	5	6	5	6	5	6	7	7	7	5	5	6	5	5	6	6	5	6	5	5	6	5	6	5
1	6	5	5	6	6	6	7	7	6	6	6	6	6	5	6	7	6	6	5	5	3	5	5	5	5	5	6	4	6	4	5	5	5	5	5
1	6	7	6	6	6	6	5	4	4	4	4	4	4	4	4	4	2	4	4	4	3	4	4	6	4	4	4	6	6	6	6	6	6	6	4
1	6	4	6	5	6	6	6	4	6	5	4	6	4	3	4	4	5	6	3	3	6	5	5	5	4	5	7	7	6	7	7	6	6	7	7
1	7	7	7	7	5	6	4	4	4	4	6	6	4	6	6	6	6	5	6	6	6	5	5	5	5	4	4	5	5	6	5	6	6	6	6
1	7	6	6	7	5	5	7	6	6	7	7	7	6	7	7	6	7	7	6	6	7	7	7	5	7	7	7	7	7	6	7	7	7	7	7
1	7	6	6	7	5	5	7	6	6	7	7	7	6	7	7	6	7	7	6	6	7	7	7	5	7	7	7	7	7	6	7	7	7	7	7
1	7	6	6	7	5	5	7	6	6	7	7	7	6	7	7	6	7	7	6	6	7	7	7	5	7	7	7	7	7	6	7	7	7	7	7
1	7	6	5	7	7	6	6	7	7	7	7	6	6	7	5	5	7	7	5	5	5	6	5	6	5	5	6	6	6	7	7	6	7	7	7
1	6	6	6	6	5	6	6	6	6	6	4	3	6	6	6	5	5	6	7	7	6	6	5	7	7	6	6	5	4	7	7	6	7	6	7
1	6	6	5	7	6	6	6	7	6	7	6	6	7	7	7	6	6	7	6	6	7	7	7	7	7	7	6	6	6	7	7	6	7	7	6
1	6	6	5	7	6	6	6	7	6	7	6	6	7	7	7	6	6	7	6	6	7	7	7	7	7	7	6	6	6	7	7	6	7	7	6
1	6	6	5	7	6	6	6	7	6	7	6	6	7	7	7	6	6	7	6	6	7	7	7	7	7	7	6	6	6	7	7	6	7	7	6
1	6	6	5	7	6	6	6	7	6	7	6	6	7	7	7	6	6	7	6	6	7	7	7	7	7	7	6	6	6	7	7	6	7	7	6
1	6	6	5	7	6	6	6	7	6	7	6	6	7	7	7	6	6	7	6	6	7	7	7	7	7	7	6	6	6	7	7	6	7	7	6
1	6	6	5	7	6	6	6	7	6	7	6	6	7	7	7	6	6	7	6	6	7	7	7	7	7	7	6	6	6	7	7	6	7	7	6
1	6	6	5	7	6	6	6	7	6	7	6	6	7	7	7	6	6	7	6	6	7	7	7	7	7	7	6	6	6	7	7	6	7	7	6
1	6	6	5	7	6	6	6	7	6	7	6	6	7	7	7	6	6	7	6	6	7	7	7	7	7	7	6	6	6	7	7	6	7	7	6
1	6	6	5	7	6	6	6	7	6	7	6	6	7	7	7	6	6	7	6	6	7	7	7	7	7	7	6	6	6	7	7	6	7	7	6
1	6	6	5	7	6	6	6	7	6	7	6	6	7	7	7	6	6	7	6	6	7	7	7	7	7	7	6	6	6	7	7	6	7	7	6
1	6	6	7	6	7	6	5	5	6	7	6	6	7	6	7	5	6	7	7	7	6	7	6	6	6	6	7	7	6	7	7	6	6	7	7
1	6	7	7	6	6	7	6	5	7	7	6	6	5	7	6	7	6	6	7	7	6	6	7	7	6	7	6	5	7	7	6	6	7	7	6
1	6	7	7	6	6	7	6	5	7	7	6	6	5	7	6	7	6	6	7	7	6	6	7	7	6	7	6	5	7	7	6	6	7	7	6
1	6	7	7	6	6	7	6	5	7	7	6	6	5	7	6	7	6	6	7	7	6	6	7	7	6	7	6	5	7	7	6	6	7	7	6
1	6	7	7	6	6	7	6	5	7	7	6	6	5	7	6	7	6	6	7	7	6	6	7	7	6	7	6	5	7	7	6	6	7	7	6
1	6	7	7	6	6	7	6	5	7	7	6	6	5	7	6	7	6	6	7	7	6	6	7	7	6	7	6	5	7	7	6	6	7	7	6
1	6	7	7	6	6	7	6	5	7	7	6	6	5	7	6	7	6	6	7	7	6	6	7	7	6	7	6	5	7	7	6	6	7	7	6
1	6	7	7	6	6	7	6	5	7	7	6	6	5	7	6	7	6	6	7	7	6	6	7	7	6	7	6	5	7	7	6	6	7	7	6
1	6	7	7	6	6	7	6	5	7	7	6	6	5	7	6	7	6	6	7	7	6	6	7	7	6	7	6	5	7	7	6	6	7	7	6
1	6	6	7	6	7	7	5	5	6	6	5	7	7	6	6	7	6	6	6	6	6	6	7	5	6	7	7	6	6	6	6	7	7	6	7
1	6	6	7	6	7	7	5	5	6	6	5	7	7	6	6	7	6	6	6	6	6	6	7	5	6	7	7	6	6	6	6	7	7	6	7
2	5	5	4	5	2	5	5	5	4	5	5	5	5	5	5	5	5	5	5	5	6	5	6	5	3	5	5	3	5	6	5	5	7	6	5
1	7	5	6	7	6	7	6	5	7	7	5	6	6	7	6	7	5	7	7	7	6	5	6	7	7	6	5	6	5	7	7	6	7	5	6
1	6	6	6	6	6	6	6	6	5	4	4	4	4	5	5	5	5	5	6	6	6	5	4	5	5	5	5	6	6	6	6	6	6	6	6
1	7	6	7	6	6	7	7	6	7	5	7	6	6	7	6	5	7	5	7	7	7	7	5	6	6	7	7	5	7	7	6	5	7	7	6
1	6	7	7	6	6	6	7	5	6	7	6	6	7	7	7	7	5	7	6	6	5	6	6	7	7	6	6	7	7	7	7	5	6	7	6
1	6	7	7	6	6	6	7	5	6	7	6	6	7	7	7	7	5	7	6	6	5	6	6	7	7	6	6	7	7	7	7	5	6	7	6
1	6	7	7	6	6	6	7	5	6	7	6	6	7	7	7	7	5	7	6	6	5	6	6	7	7	6	6	7	7	7	7	5	6	7	6
1	6	6	7	6	7	6	5	5	6	7	6	6	7	6	7	5	6	7	7	7	6	7	6	6	6	6	7	7	6	7	7	6	6	7	7
1	6	6	7	6	7	6	5	5	6	7	6	6	7	6	7	5	6	7	7	7	6	7	6	6	6	6	7	7	6	7	7	6	6	7	7
1	6	6	7	6	7	6	5	5	6	7	6	6	7	6	7	5	6	7	7	7	6	7	6	6	6	6	7	7	6	7	7	6	6	7	7
1	6	6	7	6	7	6	5	5	6	7	6	6	7	6	7	5	6	7	7	7	6	7	6	6	6	6	7	7	6	7	7	6	6	7	7
1	6	6	7	6	7	6	5	5	6	7	6	6	7	6	7	5	6	7	7	7	6	7	6	6	6	6	7	7	6	7	7	6	6	7	7
1	6	6	7	6	7	6	5	5	6	7	6	6	7	6	7	5	6	7	7	7	6	7	6	6	6	6	7	7	6	7	7	6	6	7	7
1	6	6	7	6	7	6	5	5	6	7	6	6	7	6	7	5	6	7	7	7	6	7	6	6	6	6	7	7	6	7	7	6	6	7	7
1	6	6	7	6	7	6	5	5	6	7	6	6	7	6	7	5	6	7	7	7	6	7	6	6	6	6	7	7	6	7	7	6	6	7	7
1	6	6	7	6	7	6	5	5	6	7	6	6	7	6	7	5	6	7	7	7	6	7	6	6	6	6	7	7	6	7	7	6	6	7	7
1	6	6	7	6	7	6	5	5	6	7	6	6	7	6	7	5	6	7	7	7	6	7	6	6	6	6	7	7	6	7	7	6	6	7	7
1	6	7	7	6	6	7	6	5	7	7	6	6	5	7	6	7	6	6	7	7	6	6	7	7	6	7	6	5	7	7	6	6	7	7	6
1	5	7	5	6	5	5	5	7	7	7	7	5	4	5	6	5	6	7	7	7	5	7	2	6	7	6	6	5	7	4	5	6	6	6	6
1	7	7	6	5	7	6	7	6	5	6	7	7	6	6	7	6	7	7	6	6	6	6	5	7	6	7	6	6	5	7	7	7	6	6	6
1	7	7	6	5	7	6	7	6	5	6	7	7	6	6	7	6	7	7	6	6	6	6	5	7	6	7	6	6	5	7	7	7	6	6	6
1	7	7	6	5	7	6	7	6	5	6	7	7	6	6	7	6	7	7	6	6	6	6	5	7	6	7	6	6	5	7	7	7	6	6	6
1	7	6	7	6	6	7	7	6	7	5	7	6	6	7	6	5	7	5	7	7	7	7	5	6	6	7	7	5	7	7	6	5	7	7	6
1	7	6	7	6	6	7	7	6	7	5	7	6	6	7	6	5	7	5	7	7	7	7	5	6	6	7	7	5	7	7	6	5	7	7	6
1	7	6	7	6	6	7	7	6	7	5	7	6	6	7	6	5	7	5	7	7	7	7	5	6	6	7	7	5	7	7	6	5	7	7	6
1	7	6	7	6	6	7	7	6	7	5	7	6	6	7	6	5	7	5	7	7	7	7	5	6	6	7	7	5	7	7	6	5	7	7	6
1	7	6	7	6	6	7	7	6	7	5	7	6	6	7	6	5	7	5	7	7	7	7	5	6	6	7	7	5	7	7	6	5	7	7	6
1	7	6	7	6	6	7	7	6	7	5	7	6	6	7	6	5	7	5	7	7	7	7	5	6	6	7	7	5	7	7	6	5	7	7	6
1	7	6	7	6	6	7	7	6	7	5	7	6	6	7	6	5	7	5	7	7	7	7	5	6	6	7	7	5	7	7	6	5	7	7	6
1	7	6	7	6	6	7	7	6	7	5	7	6	6	7	6	5	7	5	7	7	7	7	5	6	6	7	7	5	7	7	6	5	7	7	6
1	7	6	7	6	6	7	7	6	7	5	7	6	6	7	6	5	7	5	7	7	7	7	5	6	6	7	7	5	7	7	6	5	7	7	6
1	7	6	7	6	6	7	7	6	7	5	7	6	6	7	6	5	7	5	7	7	7	7	5	6	6	7	7	5	7	7	6	5	7	7	6
1	7	6	7	6	6	7	7	6	7	5	7	6	6	7	6	5	7	5	7	7	7	7	5	6	6	7	7	5	7	7	6	5	7	7	6
1	7	6	7	6	6	7	7	6	7	5	7	6	6	7	6	5	7	5	7	7	7	7	5	6	6	7	7	5	7	7	6	5	7	7	6
1	7	6	7	6	6	7	7	6	7	5	7	6	6	7	6	5	7	5	7	7	7	7	5	6	6	7	7	5	7	7	6	5	7	7	6
1	7	6	7	6	6	7	7	6	7	5	7	6	6	7	6	5	7	5	7	7	7	7	5	6	6	7	7	5	7	7	6	5	7	7	6
1	7	6	7	6	6	7	7	6	7	5	7	6	6	7	6	5	7	5	7	7	7	7	5	6	6	7	7	5	7	7	6	5	7	7	6
1	7	6	7	6	6	7	7	6	7	5	7	6	6	7	6	5	7	5	7	7	7	7	5	6	6	7	7	5	7	7	6	5	7	7	6
1	7	6	7	6	6	7	7	6	7	5	7	6	6	7	6	5	7	5	7	7	7	7	5	6	6	7	7	5	7	7	6	5	7	7	6
1	6	7	6	7	6	7	6	7	7	7	5	7	6	7	6	7	7	6	7	7	7	6	6	7	6	7	7	5	6	7	7	6	7	7	6
1	6	5	6	6	6	5	6	4	5	5	6	7	5	7	6	6	6	5	6	6	5	5	5	5	6	5	5	6	5	7	7	7	7	7	7
1	6	5	6	6	6	5	6	4	5	5	6	7	5	7	6	6	6	5	6	6	5	5	5	5	6	5	5	6	5	7	7	7	7	7	7
1	6	5	6	6	6	5	6	4	5	5	6	7	5	7	6	6	6	5	6	6	5	5	5	5	6	5	5	6	5	7	7	7	7	7	7
1	5	6	6	7	6	6	5	7	6	6	5	7	7	5	7	6	7	4	7	7	7	6	5	7	6	7	7	5	6	7	6	7	7	6	6
1	5	6	6	7	6	6	5	7	6	6	5	7	7	5	7	6	7	4	7	7	7	6	5	7	6	7	7	5	6	7	6	7	7	6	6
1	6	4	7	5	4	6	6	6	7	7	4	6	2	7	5	6	6	4	6	6	6	4	4	4	7	6	5	6	5	7	6	7	7	7	7
1	6	4	7	5	4	6	6	6	7	7	4	6	2	7	5	6	6	4	6	6	6	4	4	4	7	6	5	6	5	7	6	7	7	7	7
1	6	4	7	5	4	6	6	6	7	7	4	6	2	7	5	6	6	4	6	6	6	4	4	4	7	6	5	6	5	7	6	7	7	7	7
1	6	4	7	5	4	6	6	6	7	7	4	6	2	7	5	6	6	4	6	6	6	4	4	4	7	6	5	6	5	7	6	7	7	7	7
1	6	4	7	5	4	6	6	6	7	7	4	6	2	7	5	6	6	4	6	6	6	4	4	4	7	6	5	6	5	7	6	7	7	7	7
1	6	4	7	5	4	6	6	6	7	7	4	6	2	7	5	6	6	4	6	6	6	4	4	4	7	6	5	6	5	7	6	7	7	7	7
1	6	4	7	5	4	6	6	6	7	7	4	6	2	7	5	6	6	4	6	6	6	4	4	4	7	6	5	6	5	7	6	7	7	7	7
1	6	4	7	5	4	6	6	6	7	7	4	6	2	7	5	6	6	4	6	6	6	4	4	4	7	6	5	6	5	7	6	7	7	7	7
1	6	4	7	5	4	6	6	6	7	7	4	6	2	7	5	6	6	4	6	6	6	4	4	4	7	6	5	6	5	7	6	7	7	7	7
1	6	4	7	5	4	6	6	6	7	7	4	6	2	7	5	6	6	4	6	6	6	4	4	4	7	6	5	6	5	7	6	7	7	7	7
1	7	7	6	6	7	6	6	6	6	6	6	6	6	6	6	6	6	4	7	7	7	6	6	6	6	6	6	7	7	7	6	7	7	7	7
1	7	6	6	7	7	6	6	6	5	6	6	5	5	6	6	6	7	6	6	6	7	6	7	5	6	7	7	7	6	6	5	7	7	6	6
1	7	6	6	7	7	6	6	6	5	6	6	5	5	6	6	6	7	6	6	6	7	6	7	5	6	7	7	7	6	6	5	7	7	6	6
1	7	6	6	7	7	6	6	6	5	6	6	5	5	6	6	6	7	6	6	6	7	6	7	5	6	7	7	7	6	6	5	7	7	6	6
1	7	6	6	7	7	6	6	6	5	6	6	5	5	6	6	6	7	6	6	6	7	6	7	5	6	7	7	7	6	6	5	7	7	6	6
1	7	6	6	7	7	6	6	6	5	6	6	5	5	6	6	6	7	6	6	6	7	6	7	5	6	7	7	7	6	6	5	7	7	6	6
1	7	6	6	7	7	6	6	6	5	6	6	5	5	6	6	6	7	6	6	6	7	6	7	5	6	7	7	7	6	6	5	7	7	6	6
1	7	6	6	7	7	6	6	6	5	6	6	5	5	6	6	6	7	6	6	6	7	6	7	5	6	7	7	7	6	6	5	7	7	6	6
1	7	6	6	7	7	6	6	6	5	6	6	5	5	6	6	6	7	6	6	6	7	6	7	5	6	7	7	7	6	6	5	7	7	6	6
1	3	2	3	4	2	3	3	2	3	5	3	4	4	4	4	3	3	3	3	3	4	3	4	3	5	6	5	5	4	5	6	5	5	6	6
1	3	2	3	4	2	3	3	2	3	5	3	4	4	4	4	3	3	3	3	3	4	3	4	3	5	6	5	5	4	5	6	5	5	6	6
1	3	2	3	4	2	3	3	2	3	5	3	4	4	4	4	3	3	3	3	3	4	3	4	3	5	6	5	5	4	5	6	5	5	6	6
1	3	2	3	4	2	3	3	2	3	5	3	4	4	4	4	3	3	3	3	3	4	3	4	3	5	6	5	5	4	5	6	5	5	6	6
1	3	2	3	4	2	3	3	2	3	5	3	4	4	4	4	3	3	3	3	3	4	3	4	3	5	6	5	5	4	5	6	5	5	6	6
1	3	2	3	4	2	3	3	2	3	5	3	4	4	4	4	3	3	3	3	3	4	3	4	3	5	6	5	5	4	5	6	5	5	6	6
1	3	2	3	4	2	3	3	2	3	5	3	4	4	4	4	3	3	3	3	3	4	3	4	3	5	6	5	5	4	5	6	5	5	6	6
1	3	2	3	4	2	3	3	2	3	5	3	4	4	4	4	3	3	3	3	3	4	3	4	3	5	6	5	5	4	5	6	5	5	6	6
1	6	6	7	5	7	7	6	5	6	6	7	6	6	7	6	7	5	7	6	6	7	6	5	7	7	6	6	7	7	7	6	7	6	6	6
1	6	6	7	5	7	7	6	5	6	6	7	6	6	7	6	7	5	7	6	6	7	6	5	7	7	6	6	7	7	7	6	7	6	6	6
1	6	6	7	5	7	7	6	5	6	6	7	6	6	7	6	7	5	7	6	6	7	6	5	7	7	6	6	7	7	7	6	7	6	6	6
1	6	6	7	5	6	6	6	6	6	7	6	6	6	5	5	6	5	5	6	6	5	5	6	5	5	5	4	5	6	6	6	5	6	6	7
1	6	6	7	5	6	6	6	6	6	7	6	6	6	5	5	6	5	5	6	6	5	5	6	5	5	5	4	5	6	6	6	5	6	6	7
1	6	6	7	5	6	6	6	6	6	7	6	6	6	5	5	6	5	5	6	6	5	5	6	5	5	5	4	5	6	6	6	5	6	6	7
1	6	6	7	5	6	6	6	6	6	7	6	6	6	5	5	6	5	5	6	6	5	5	6	5	5	5	4	5	6	6	6	5	6	6	7
1	6	6	7	5	6	6	6	6	6	7	6	6	6	5	5	6	5	5	6	6	5	5	6	5	5	5	4	5	6	6	6	5	6	6	7
1	6	6	7	5	6	6	6	6	6	7	6	6	6	5	5	6	5	5	6	6	5	5	6	5	5	5	4	5	6	6	6	5	6	6	7
1	6	6	7	5	6	6	6	6	6	7	6	6	6	5	5	6	5	5	6	6	5	5	6	5	5	5	4	5	6	6	6	5	6	6	7
1	6	6	7	5	6	6	6	6	6	7	6	6	6	5	5	6	5	5	6	6	5	5	6	5	5	5	4	5	6	6	6	5	6	6	7
2	4	5	5	4	6	4	6	5	5	5	6	5	5	5	6	4	5	4	6	6	7	6	4	6	4	3	4	5	5	6	6	5	5	5	5
1	6	5	5	6	6	5	6	6	7	7	5	7	7	4	7	6	6	5	6	6	6	6	6	6	7	7	7	7	7	5	7	6	6	4	6
1	4	4	3	4	4	5	4	5	5	5	2	6	6	5	5	2	6	4	5	5	4	5	5	4	6	4	5	4	5	5	6	5	4	6	4
1	4	4	3	4	4	5	4	5	5	5	2	6	6	5	5	2	6	4	5	5	4	5	5	4	6	4	5	4	5	5	6	5	4	6	4
1	4	4	3	4	4	5	4	5	5	5	2	6	6	5	5	2	6	4	5	5	4	5	5	4	6	4	5	4	5	5	6	5	4	6	4
1	4	4	3	4	4	5	4	5	5	5	2	6	6	5	5	2	6	4	5	5	4	5	5	4	6	4	5	4	5	5	6	5	4	6	4
1	4	4	3	4	4	5	4	5	5	5	2	6	6	5	5	2	6	4	5	5	4	5	5	4	6	4	5	4	5	5	6	5	4	6	4
1	4	4	3	4	4	5	4	5	5	5	2	6	6	5	5	2	6	4	5	5	4	5	5	4	6	4	5	4	5	5	6	5	4	6	4
1	4	4	3	4	4	5	4	5	5	5	2	6	6	5	5	2	6	4	5	5	4	5	5	4	6	4	5	4	5	5	6	5	4	6	4
1	4	4	3	4	4	5	4	5	5	5	2	6	6	5	5	2	6	4	5	5	4	5	5	4	6	4	5	4	5	5	6	5	4	6	4
1	4	4	3	4	4	5	4	5	5	5	2	6	6	5	5	2	6	4	5	5	4	5	5	4	6	4	5	4	5	5	6	5	4	6	4
1	4	4	3	4	4	5	4	5	5	5	2	6	6	5	5	2	6	4	5	5	4	5	5	4	6	4	5	4	5	5	6	5	4	6	4
1	4	4	3	4	4	5	4	5	5	5	2	6	6	5	5	2	6	4	5	5	4	5	5	4	6	4	5	4	5	5	6	5	4	6	4
1	4	4	3	4	4	5	4	5	5	5	2	6	6	5	5	2	6	4	5	5	4	5	5	4	6	4	5	4	5	5	6	5	4	6	4
1	4	4	3	4	4	5	4	5	5	5	2	6	6	5	5	2	6	4	5	5	4	5	5	4	6	4	5	4	5	5	6	5	4	6	4
1	7	6	6	7	7	6	6	6	5	6	6	5	5	6	6	6	7	6	6	6	7	6	7	5	6	7	7	7	6	6	5	7	7	6	6
1	6	6	7	7	7	7	7	7	6	7	6	6	5	7	6	7	7	7	7	7	6	7	6	7	7	5	6	6	6	7	6	7	5	6	6
1	6	6	7	7	7	7	7	7	6	7	6	6	5	7	6	7	7	7	7	7	6	7	6	7	7	5	6	6	6	7	6	7	5	6	6
1	6	6	7	7	7	7	7	7	6	7	6	6	5	7	6	7	7	7	7	7	6	7	6	7	7	5	6	6	6	7	6	7	5	6	6
1	6	6	7	7	7	7	7	7	6	7	6	6	5	7	6	7	7	7	7	7	6	7	6	7	7	5	6	6	6	7	6	7	5	6	6
1	6	6	7	7	7	7	7	7	6	7	6	6	5	7	6	7	7	7	7	7	6	7	6	7	7	5	6	6	6	7	6	7	5	6	6
1	6	6	7	7	7	7	7	7	6	7	6	6	5	7	6	7	7	7	7	7	6	7	6	7	7	5	6	6	6	7	6	7	5	6	6
1	6	6	7	7	7	7	7	7	6	7	6	6	5	7	6	7	7	7	7	7	6	7	6	7	7	5	6	6	6	7	6	7	5	6	6
1	6	6	7	7	7	7	7	7	6	7	6	6	5	7	6	7	7	7	7	7	6	7	6	7	7	5	6	6	6	7	6	7	5	6	6
1	6	6	7	7	7	7	7	7	6	7	6	6	5	7	6	7	7	7	7	7	6	7	6	7	7	5	6	6	6	7	6	7	5	6	6
1	6	6	7	7	7	7	7	7	6	7	6	6	5	7	6	7	7	7	7	7	6	7	6	7	7	5	6	6	6	7	6	7	5	6	6
1	6	6	5	6	6	7	5	5	5	6	7	5	5	7	7	6	7	6	6	6	7	5	5	6	5	6	6	6	6	7	7	7	6	6	6
1	6	6	5	6	6	7	5	5	5	6	7	5	5	7	7	6	7	6	6	6	7	5	5	6	5	6	6	6	6	7	7	7	6	6	6
1	6	6	5	6	6	7	5	5	5	6	7	5	5	7	7	6	7	6	6	6	7	5	5	6	5	6	6	6	6	7	7	7	6	6	6
2	2	3	5	3	3	5	5	5	7	5	5	5	6	6	6	7	6	6	6	6	5	3	5	3	3	5	5	6	5	5	5	4	4	5	4
1	6	5	4	6	7	5	5	5	6	5	5	5	7	6	5	6	5	6	4	4	6	5	6	6	6	6	6	7	6	7	6	7	6	7	6
1	6	5	4	6	7	5	5	5	6	5	5	5	7	6	5	6	5	6	4	4	6	5	6	6	6	6	6	7	6	7	6	7	6	7	6
1	6	5	4	6	7	5	5	5	6	5	5	5	7	6	5	6	5	6	4	4	6	5	6	6	6	6	6	7	6	7	6	7	6	7	6
1	5	3	4	6	4	3	7	6	7	6	6	6	6	5	4	3	4	4	3	3	2	6	4	4	6	6	6	6	5	5	5	5	5	6	6
1	5	3	4	6	4	3	7	6	7	6	6	6	6	5	4	3	4	4	3	3	2	6	4	4	6	6	6	6	5	5	5	5	5	6	6
1	5	3	4	6	4	3	7	6	7	6	6	6	6	5	4	3	4	4	3	3	2	6	4	4	6	6	6	6	5	5	5	5	5	6	6
1	5	3	4	6	4	3	7	6	7	6	6	6	6	5	4	3	4	4	3	3	2	6	4	4	6	6	6	6	5	5	5	5	5	6	6
1	5	3	4	6	4	3	7	6	7	6	6	6	6	5	4	3	4	4	3	3	2	6	4	4	6	6	6	6	5	5	5	5	5	6	6
1	5	3	4	6	4	3	7	6	7	6	6	6	6	5	4	3	4	4	3	3	2	6	4	4	6	6	6	6	5	5	5	5	5	6	6
1	5	3	4	6	4	3	7	6	7	6	6	6	6	5	4	3	4	4	3	3	2	6	4	4	6	6	6	6	5	5	5	5	5	6	6
1	5	3	4	6	4	3	7	6	7	6	6	6	6	5	4	3	4	4	3	3	2	6	4	4	6	6	6	6	5	5	5	5	5	6	6
1	5	3	4	6	4	3	7	6	7	6	6	6	6	5	4	3	4	4	3	3	2	6	4	4	6	6	6	6	5	5	5	5	5	6	6
2	6	7	6	7	5	6	7	4	7	6	5	7	5	7	6	3	6	6	6	6	2	5	4	4	5	3	5	5	6	7	7	7	6	6	5
2	6	7	6	7	5	6	7	5	6	6	6	6	6	7	6	3	6	6	7	7	1	4	4	3	5	4	6	6	6	7	7	7	6	6	5
2	6	7	6	7	5	6	7	4	6	6	6	6	6	7	6	3	6	6	7	7	1	4	4	3	5	4	6	6	6	7	7	7	6	6	5
1	6	6	5	6	6	6	7	5	7	7	6	7	5	7	7	6	5	6	6	6	5	7	7	5	7	6	5	6	5	6	6	5	6	6	7
1	6	6	5	6	6	6	7	5	7	7	6	7	5	7	7	6	5	6	6	6	5	7	7	5	7	6	5	6	5	6	6	5	6	6	7
1	6	6	5	6	6	6	7	5	7	7	6	7	5	7	7	6	5	6	6	6	5	7	7	5	7	6	5	6	5	6	6	5	6	6	7
1	6	6	7	6	6	6	7	6	5	5	6	7	7	7	6	5	6	6	7	7	6	6	6	5	6	7	7	6	6	6	6	7	6	5	5
1	6	6	7	6	6	6	7	6	5	5	6	7	7	7	6	5	6	6	7	7	6	6	6	5	6	7	7	6	6	6	6	7	6	5	5
1	6	6	7	6	6	6	7	6	5	5	6	7	7	7	6	5	6	6	7	7	6	6	6	5	6	7	7	6	6	6	6	7	6	5	5
2	4	4	5	5	5	5	5	6	5	2	2	3	2	6	6	6	6	7	5	5	6	5	5	6	5	4	3	5	6	5	5	5	6	6	5
1	6	6	7	7	7	6	7	7	7	6	7	6	6	7	7	6	6	7	6	6	5	6	7	6	7	6	7	7	6	7	7	5	6	6	7
1	6	6	7	7	7	6	7	7	7	6	7	6	6	7	7	6	6	7	6	6	5	6	7	6	7	6	7	7	6	7	7	5	6	6	7
1	6	6	7	7	7	6	7	7	7	6	7	6	6	7	7	6	6	7	6	6	5	6	7	6	7	6	7	7	6	7	7	5	6	6	7
1	6	6	7	7	7	6	7	7	7	6	7	6	6	7	7	6	6	7	6	6	5	6	7	6	7	6	7	7	6	7	7	5	6	6	7
1	6	6	7	7	7	6	7	7	7	6	7	6	6	7	7	6	6	7	6	6	5	6	7	6	7	6	7	7	6	7	7	5	6	6	7
1	6	6	7	7	7	6	7	7	7	6	7	6	6	7	7	6	6	7	6	6	5	6	7	6	7	6	7	7	6	7	7	5	6	6	7
1	6	6	7	7	7	6	7	7	7	6	7	6	6	7	7	6	6	7	6	6	5	6	7	6	7	6	7	7	6	7	7	5	6	6	7
1	6	6	7	7	7	6	7	7	7	6	7	6	6	7	7	6	6	7	6	6	5	6	7	6	7	6	7	7	6	7	7	5	6	6	7
1	6	6	7	7	7	6	7	7	7	6	7	6	6	7	7	6	6	7	6	6	5	6	7	6	7	6	7	7	6	7	7	5	6	6	7
1	6	5	5	6	6	6	7	6	7	6	7	6	6	7	7	6	5	6	6	6	6	7	6	7	5	7	7	7	7	7	6	6	7	7	7
1	6	5	5	6	6	6	7	6	7	6	7	6	6	7	7	6	5	6	6	6	6	7	6	7	5	7	7	7	7	7	6	6	7	7	7
1	6	5	5	6	6	6	7	6	7	6	7	6	6	7	7	6	5	6	6	6	6	7	6	7	5	7	7	7	7	7	6	6	7	7	7
2	7	6	6	6	5	5	4	4	5	5	5	5	5	5	5	5	5	5	5	5	5	4	4	3	5	5	4	4	5	5	5	3	4	5	5
1	7	7	6	6	6	6	6	7	6	7	6	7	7	7	7	7	6	7	7	7	7	6	7	6	6	7	6	7	6	7	7	6	7	5	7
1	7	7	6	6	6	6	6	7	6	7	6	7	7	7	7	7	6	7	7	7	7	6	7	6	6	7	6	7	6	7	7	6	7	5	7
1	7	7	6	6	6	6	6	7	6	7	6	7	7	7	7	7	6	7	7	7	7	6	7	6	6	7	6	7	6	7	7	6	7	5	7
1	7	7	6	6	6	6	6	7	6	7	6	7	7	7	7	7	6	7	7	7	7	6	7	6	6	7	6	7	6	7	7	6	7	5	7
1	7	7	6	6	6	6	6	7	6	7	6	7	7	7	7	7	6	7	7	7	7	6	7	6	6	7	6	7	6	7	7	6	7	5	7
1	7	7	6	6	6	6	6	7	6	7	6	7	7	7	7	7	6	7	7	7	7	6	7	6	6	7	6	7	6	7	7	6	7	5	7
1	7	7	6	6	6	6	6	7	6	7	6	7	7	7	7	7	6	7	7	7	7	6	7	6	6	7	6	7	6	7	7	6	7	5	7
1	7	7	6	6	6	6	6	7	6	7	6	7	7	7	7	7	6	7	7	7	7	6	7	6	6	7	6	7	6	7	7	6	7	5	7
1	7	7	6	6	6	6	6	7	6	7	6	7	7	7	7	7	6	7	7	7	7	6	7	6	6	7	6	7	6	7	7	6	7	5	7
1	4	5	5	4	5	4	7	5	6	7	6	6	7	7	7	6	7	6	7	7	7	6	6	6	7	6	6	6	5	7	7	7	5	6	6
1	4	5	5	3	5	3	7	5	6	7	6	6	7	7	7	6	7	6	7	7	7	6	6	6	7	6	6	6	5	7	7	7	5	6	6
1	4	5	5	4	5	4	7	5	6	7	6	6	7	7	7	6	7	6	7	7	7	6	6	6	7	6	6	6	5	7	7	7	5	6	6
1	4	5	5	3	5	3	7	5	6	7	6	6	7	7	7	6	7	6	7	7	7	6	6	6	7	6	6	6	5	7	7	7	5	6	6
1	4	5	5	4	5	4	7	5	6	7	6	6	7	7	7	6	7	6	7	7	7	6	6	6	7	6	6	6	5	7	7	7	5	6	6
1	4	5	5	3	5	3	7	5	6	7	6	6	7	7	7	6	7	6	7	7	7	6	6	6	7	6	6	6	5	7	7	7	5	6	6
1	4	5	5	4	5	4	7	5	6	7	6	6	7	7	7	6	7	6	7	7	7	6	6	6	7	6	6	6	5	7	7	7	5	6	6
1	4	5	5	3	5	3	7	5	6	7	6	6	7	7	7	6	7	6	7	7	7	6	6	6	7	6	6	6	5	7	7	7	5	6	6
1	4	5	5	4	5	4	7	5	6	7	6	6	7	7	7	6	7	6	7	7	7	6	6	6	7	6	6	6	5	7	7	7	5	6	6
1	4	5	5	3	5	3	7	5	6	7	6	6	7	7	7	6	7	6	7	7	7	6	6	6	7	6	6	6	5	7	7	7	5	6	6
1	4	5	5	4	5	4	7	5	6	7	6	6	7	7	7	6	7	6	7	7	7	6	6	6	7	6	6	6	5	7	7	7	5	6	6
1	4	5	5	3	5	3	7	5	6	7	6	6	7	7	7	6	7	6	7	7	7	6	6	6	7	6	6	6	5	7	7	7	5	6	6
1	4	5	5	4	5	4	7	5	6	7	6	6	7	7	7	6	7	6	7	7	7	6	6	6	7	6	6	6	5	7	7	7	5	6	6
1	4	5	5	3	5	3	7	5	6	7	6	6	7	7	7	6	7	6	7	7	7	6	6	6	7	6	6	6	5	7	7	7	5	6	6
1	4	5	5	4	5	4	7	5	6	7	6	6	7	7	7	6	7	6	7	7	7	6	6	6	7	6	6	6	5	7	7	7	5	6	6
1	4	5	5	3	5	3	7	5	6	7	6	6	7	7	7	6	7	6	7	7	7	6	6	6	7	6	6	6	5	7	7	7	5	6	6
1	4	5	5	4	5	4	7	5	6	7	6	6	7	7	7	6	7	6	7	7	7	6	6	6	7	6	6	6	5	7	7	7	5	6	6
1	4	5	5	3	5	3	7	5	6	7	6	6	7	7	7	6	7	6	7	7	7	6	6	6	7	6	6	6	5	7	7	7	5	6	6
1	5	2	1	2	3	3	2	2	1	2	2	2	2	2	3	3	2	3	3	3	1	3	2	2	2	2	2	1	1	2	3	3	3	3	3
1	6	6	6	6	7	6	4	4	4	4	4	6	2	4	4	2	2	4	2	2	4	5	2	4	2	4	6	6	6	4	4	4	4	4	4
1	5	5	5	5	5	5	7	7	5	7	5	7	7	7	5	7	7	5	7	7	7	7	7	7	7	7	7	7	7	7	5	7	7	7	7
1	6	6	4	6	6	6	6	5	4	6	6	5	4	6	5	5	5	6	5	5	6	6	6	6	6	5	4	5	6	5	5	6	5	4	5
1	5	4	3	4	5	5	5	4	5	5	6	7	7	4	5	4	6	6	5	5	6	4	5	4	5	5	5	5	4	6	4	4	4	4	4
2	3	5	6	3	3	4	7	6	3	3	5	6	6	6	6	5	6	5	6	6	6	6	5	6	5	6	6	6	6	6	6	6	6	4	6
1	7	6	6	7	5	5	6	6	7	7	5	5	6	4	4	3	4	5	5	5	4	5	5	4	7	5	6	7	6	7	5	7	7	7	7
1	5	3	3	5	5	5	5	5	5	5	5	5	5	5	5	5	5	5	5	5	5	5	5	5	5	5	5	6	6	7	7	5	5	5	5
2	5	4	5	5	4	5	3	3	3	3	4	2	2	6	7	6	6	6	5	5	6	6	6	6	4	5	5	6	6	6	6	6	6	4	6
1	5	6	6	6	6	5	5	7	5	5	6	6	7	5	6	5	5	6	6	6	6	6	7	6	6	7	7	5	6	6	6	5	4	7	7
1	5	6	6	6	6	5	5	7	5	5	6	6	7	5	6	5	5	6	6	6	6	6	7	6	6	7	7	5	6	6	6	5	4	7	7
1	5	6	6	6	6	5	5	7	5	5	6	6	7	5	6	5	5	6	6	6	6	6	7	6	6	7	7	5	6	6	6	5	4	7	7
1	6	5	6	7	5	6	6	6	7	6	5	7	7	6	6	7	6	6	6	6	5	4	6	4	7	5	5	7	6	5	5	6	5	7	7
1	6	5	6	7	5	6	6	7	7	6	5	7	7	6	6	7	6	6	6	6	5	4	6	4	7	5	5	7	6	5	5	6	5	7	7
1	6	5	6	7	5	6	6	7	7	6	5	7	7	6	6	7	6	6	6	6	5	4	6	4	7	5	5	7	6	5	5	6	5	7	7
1	6	5	6	7	5	6	6	7	7	6	5	7	7	6	6	7	6	6	6	6	5	4	6	4	7	5	5	7	6	5	5	6	5	7	7
1	6	5	6	7	5	6	6	7	7	6	5	7	7	6	6	7	6	6	6	6	5	4	6	4	7	5	5	7	6	5	5	6	5	7	7
1	6	5	6	7	5	6	6	7	7	6	5	7	7	6	6	7	6	6	6	6	5	4	6	4	7	5	5	7	6	5	5	6	5	7	7
1	6	5	6	5	5	6	6	7	7	6	5	7	7	6	6	7	6	6	6	6	5	4	6	4	7	5	5	7	6	5	5	6	5	7	7
1	6	5	6	7	5	6	6	7	7	6	5	7	7	6	6	7	6	6	6	6	5	4	6	4	7	5	5	7	6	5	5	6	5	7	7
1	6	5	6	7	5	6	6	7	7	6	5	7	7	6	6	7	6	6	6	6	5	4	6	4	7	5	5	7	6	5	5	6	5	7	7
1	6	5	6	7	5	6	6	7	7	6	5	7	7	6	6	7	6	6	6	6	5	4	6	4	7	5	5	7	6	5	5	6	5	7	7
1	5	4	4	6	5	4	4	4	4	4	4	5	4	3	4	2	2	3	4	4	4	4	4	4	4	4	5	3	5	4	4	5	4	4	3
1	6	7	7	6	6	6	6	6	6	4	7	6	6	7	6	5	7	6	7	7	6	7	5	6	6	7	6	6	6	7	7	5	5	6	6
1	6	7	7	6	6	6	6	6	6	4	7	6	6	7	6	5	7	6	7	7	6	7	5	6	6	7	6	6	6	7	7	5	5	6	6
1	6	7	7	6	6	6	6	6	6	4	7	6	6	7	6	5	7	6	7	7	6	7	5	6	6	7	6	6	6	7	7	5	5	6	6
1	6	7	7	6	6	6	6	6	6	4	7	6	6	7	6	5	7	6	7	7	6	7	5	6	6	7	6	6	6	7	7	5	5	6	6
1	6	7	7	6	6	6	6	6	6	4	7	6	6	7	6	5	7	6	7	7	6	7	5	6	6	7	6	6	6	7	7	5	5	6	6
1	6	7	7	6	6	6	6	6	6	4	7	6	6	7	6	5	7	6	7	7	6	7	5	6	6	7	6	6	6	7	7	5	5	6	6
1	6	7	7	6	6	6	6	6	6	4	7	6	6	7	6	5	7	6	7	7	6	7	5	6	6	7	6	6	6	7	7	5	5	6	6
1	6	7	7	6	6	6	6	6	6	4	7	6	6	7	6	5	7	6	7	7	6	7	5	6	6	7	6	6	6	7	7	5	5	6	6
1	6	7	7	6	6	6	6	6	6	4	7	6	6	7	6	5	7	6	7	7	6	7	5	6	6	7	6	6	6	7	7	5	5	6	6
1	6	7	7	6	6	6	6	6	6	4	7	6	6	7	6	5	7	6	7	7	6	7	5	6	6	7	6	6	6	7	7	5	5	6	6
1	6	7	7	6	6	6	6	6	6	4	7	6	6	7	6	5	7	6	7	7	6	7	5	6	6	7	6	6	6	7	7	5	5	6	6
1	6	7	7	6	6	6	6	6	6	4	7	6	6	7	6	5	7	6	7	7	6	7	5	6	6	7	6	6	6	7	7	5	5	6	6
1	6	7	7	6	6	6	6	6	6	4	7	6	6	7	6	5	7	6	7	7	6	7	5	6	6	7	6	6	6	7	7	5	5	6	6
1	6	7	7	6	6	6	6	6	6	4	7	6	6	7	6	5	7	6	7	7	6	7	5	6	6	7	6	6	6	7	7	5	5	6	6
1	6	7	7	6	6	6	6	6	6	4	7	6	6	7	6	5	7	6	7	7	6	7	5	6	6	7	6	6	6	7	7	5	5	6	6
1	6	7	7	6	6	6	6	6	6	4	7	6	6	7	6	5	7	6	7	7	6	7	5	6	6	7	6	6	6	7	7	5	5	6	6
1	6	7	7	6	6	6	6	6	6	4	7	6	6	7	6	5	7	6	7	7	6	7	5	6	6	7	6	6	6	7	7	5	5	6	6
1	6	7	7	6	6	6	6	6	6	4	7	6	6	7	6	5	7	6	7	7	6	7	5	6	6	7	6	6	6	7	7	5	5	6	6
2	5	6	7	6	5	7	5	6	5	6	5	5	6	5	6	3	6	7	7	7	5	5	6	5	5	6	6	5	6	5	4	6	5	6	5
1	5	5	6	7	7	7	6	6	6	5	6	6	5	7	7	6	7	6	6	6	6	6	6	5	6	7	5	5	5	6	6	7	6	6	6
1	5	5	6	7	7	7	6	6	6	5	6	6	5	7	7	6	7	6	6	6	6	6	6	5	6	7	5	5	5	6	6	7	6	6	6
1	5	5	6	7	7	7	6	6	6	5	6	6	5	7	7	6	7	6	6	6	6	6	6	5	6	7	5	5	5	6	6	7	6	6	6
1	6	7	5	5	7	5	5	7	7	6	7	5	6	6	7	5	5	7	5	5	7	7	6	7	6	6	6	6	5	6	7	5	6	7	7
1	6	7	5	5	7	5	5	7	7	6	7	5	6	6	7	5	5	7	5	5	7	7	6	7	6	6	6	6	5	6	7	5	6	7	7
1	7	6	6	5	7	7	7	7	7	5	7	7	7	5	6	6	6	6	7	7	7	6	6	6	6	6	7	7	7	5	5	7	7	6	6
1	6	7	7	4	5	4	4	6	6	6	7	5	4	6	6	5	7	7	6	6	7	4	7	6	7	6	6	7	6	7	6	6	6	5	5
1	6	7	7	4	5	4	4	6	6	6	7	5	4	6	6	5	7	7	6	6	7	4	7	6	7	6	6	7	6	7	6	6	6	5	5
1	6	7	7	4	5	4	4	6	6	6	7	5	4	6	6	5	7	7	6	6	7	4	7	6	7	6	6	7	6	7	6	6	6	5	5
1	7	4	7	4	7	7	7	6	6	4	4	7	7	4	4	7	4	4	6	6	4	6	7	6	4	6	7	6	4	6	6	6	6	4	5
1	6	6	6	6	1	5	6	7	6	6	5	6	5	6	6	6	5	6	4	4	5	5	5	5	6	6	6	5	5	6	6	6	6	6	4
1	6	2	4	6	5	6	4	5	5	4	4	4	5	5	3	3	3	3	5	5	5	5	4	3	4	3	3	6	5	4	6	5	5	5	4
1	6	2	4	6	5	6	4	5	5	4	4	4	5	5	3	3	3	3	5	5	5	5	4	3	4	3	3	6	5	4	6	5	5	5	4
1	7	7	6	6	6	6	7	7	7	6	7	7	7	6	6	7	7	7	7	7	7	7	7	7	4	4	7	7	7	6	6	6	6	7	7
1	3	2	3	4	2	3	3	2	3	5	3	4	4	4	4	3	3	3	3	3	4	3	4	3	5	6	5	5	4	5	6	5	5	6	6
1	6	6	4	4	6	5	5	6	6	1	6	6	5	4	4	5	4	4	4	4	4	6	6	5	4	5	6	5	5	5	5	6	4	6	4
1	4	6	4	4	5	4	6	4	6	4	5	6	6	4	5	5	3	6	5	5	2	4	4	6	4	5	6	6	6	5	5	4	4	4	4
1	4	3	1	4	5	4	4	4	4	4	1	4	4	4	4	4	4	1	4	4	1	4	4	4	4	4	4	5	5	7	4	4	4	4	4
1	4	3	1	4	5	4	4	4	4	4	1	4	4	4	4	4	4	1	4	4	1	4	4	4	4	4	4	5	5	7	4	4	4	4	4
1	7	1	1	7	2	6	1	7	4	4	4	7	4	1	2	1	1	4	4	4	1	4	4	4	4	3	4	1	1	4	4	4	4	4	4
1	7	6	6	6	7	7	5	5	6	6	3	5	4	6	5	6	5	5	5	5	5	5	5	3	3	3	5	5	5	5	5	5	5	5	5
1	6	6	7	4	4	4	6	7	6	7	6	6	6	6	5	4	4	7	6	6	7	6	4	7	7	6	6	4	5	7	7	6	7	7	4
1	6	6	7	4	4	4	6	7	6	7	6	6	6	6	5	4	4	7	6	6	7	6	4	7	7	6	6	4	5	7	7	6	7	7	4
1	6	6	7	4	4	4	6	7	6	7	6	6	6	6	5	4	4	7	6	6	7	6	4	7	7	6	6	4	5	7	7	6	7	7	4
1	6	6	5	5	6	6	6	4	6	5	5	5	5	5	5	4	5	5	5	5	4	6	6	5	6	5	5	7	6	5	6	6	5	5	5
1	7	4	4	5	6	6	5	6	6	5	5	4	4	3	3	3	3	6	4	4	3	4	4	4	5	5	6	6	5	7	5	6	6	6	6
1	7	7	6	6	7	7	5	6	7	5	5	5	5	7	7	7	7	7	7	7	2	7	7	7	5	5	6	6	6	4	6	7	7	7	7
1	6	7	4	6	5	7	6	4	4	4	4	6	4	4	4	4	4	5	4	4	3	4	4	4	4	4	4	6	4	4	4	3	4	4	4
2	2	2	2	3	3	2	3	3	3	3	4	2	1	5	5	6	6	4	5	5	6	3	5	4	3	3	3	2	3	2	2	3	5	4	4
2	5	5	5	5	5	4	5	5	6	5	5	5	4	5	5	4	6	5	6	6	5	6	6	6	4	5	5	6	6	7	3	5	5	5	5
1	7	7	7	6	6	6	7	7	7	7	6	7	7	6	6	7	6	5	6	6	6	6	5	4	6	7	5	6	7	7	6	7	5	5	7
1	7	7	7	6	6	6	7	7	7	7	6	7	7	6	6	7	6	5	6	6	6	6	5	4	6	7	5	6	7	7	6	7	5	5	7
1	7	7	7	6	6	6	7	7	7	7	6	7	7	6	6	7	6	5	6	6	6	6	5	4	6	7	5	6	7	7	6	7	5	5	7
1	5	4	5	5	5	4	5	4	5	5	5	5	6	6	6	7	6	5	6	6	7	6	7	5	6	7	5	6	5	7	7	6	6	6	5
1	5	4	5	5	5	4	5	4	5	5	5	5	6	6	6	7	6	5	6	6	7	6	7	5	6	7	5	6	5	7	7	6	6	6	5
1	5	4	5	5	5	4	5	4	5	5	5	5	6	6	6	7	6	5	6	6	7	6	7	5	6	7	5	6	5	7	7	6	6	6	5
2	5	6	7	6	5	7	5	6	4	6	4	5	6	5	6	4	6	7	7	7	5	5	6	5	5	6	6	5	6	5	4	6	5	6	5
2	5	5	4	5	5	4	5	4	6	5	5	6	4	5	5	3	6	5	6	6	5	5	5	5	4	5	5	6	6	7	4	5	5	5	5
1	6	7	7	6	6	6	6	6	6	4	7	6	6	7	6	5	7	6	7	7	6	7	5	6	6	7	6	6	6	7	7	5	5	6	6
1	6	6	5	5	5	5	7	5	4	4	6	5	6	5	5	6	6	7	7	7	6	6	7	5	7	6	6	6	6	7	7	5	5	4	6
1	6	6	5	5	5	5	7	5	4	4	6	5	6	5	5	6	6	7	7	7	6	6	7	5	7	6	6	6	6	7	7	5	5	4	6
1	6	6	5	5	5	5	7	5	4	4	6	5	6	5	5	6	6	7	7	7	6	6	7	5	7	6	6	6	6	7	7	5	5	4	6
1	5	6	6	4	3	5	4	4	4	4	4	5	4	3	4	4	3	4	4	4	4	4	4	4	4	4	4	4	4	4	5	4	4	4	4
1	6	6	2	4	5	4	4	4	4	6	4	4	4	4	4	4	5	5	4	4	2	5	5	5	4	4	4	6	6	6	4	5	4	4	4
1	4	5	2	4	6	2	4	6	6	4	4	4	4	6	4	4	6	6	4	4	2	4	4	4	4	4	6	5	5	4	6	6	6	6	4
1	7	7	7	7	7	7	6	6	7	7	7	6	6	7	7	7	7	7	7	7	7	7	7	7	5	6	6	6	6	5	6	6	6	4	7
1	6	6	4	4	6	5	5	4	6	1	6	6	5	5	5	5	4	6	5	5	6	5	6	6	6	6	6	6	6	6	6	6	4	6	4
1	7	7	4	6	6	6	7	4	6	6	4	7	6	6	6	4	4	6	6	6	7	6	4	7	6	6	4	6	6	6	6	6	6	7	4
1	7	7	6	7	7	6	5	3	6	4	6	5	5	6	5	6	7	5	6	6	6	6	4	4	5	4	6	6	5	4	6	5	5	6	4
1	7	7	6	7	7	6	5	3	6	4	6	7	5	6	5	6	7	5	6	6	6	6	4	4	5	4	6	6	5	4	6	5	5	6	4
1	7	7	6	7	7	6	5	3	6	4	6	7	5	6	5	6	7	5	6	6	6	6	4	4	5	4	6	6	5	4	6	5	5	6	4
1	7	7	6	7	7	6	5	3	6	4	6	7	5	6	5	6	7	5	6	6	6	6	4	4	5	4	6	6	5	4	6	5	5	6	4
1	7	7	6	7	7	6	5	3	6	4	6	7	5	6	5	6	7	5	6	6	6	6	4	4	5	4	6	6	5	4	6	5	5	6	4
1	7	7	6	7	7	6	5	3	6	4	6	7	5	6	5	6	7	5	6	6	6	6	4	4	5	4	6	6	5	4	6	5	5	6	4
1	7	7	6	7	7	6	5	3	6	4	6	7	5	6	5	6	7	5	6	6	6	6	4	4	5	4	6	6	5	4	6	5	5	6	4
1	7	7	6	7	7	6	5	3	6	4	6	7	5	6	5	6	7	5	6	6	6	6	4	4	5	4	6	6	5	4	6	5	5	6	4
1	7	7	6	7	7	6	5	3	6	4	6	7	5	6	5	6	7	5	6	6	6	6	4	4	5	4	6	6	5	4	6	5	5	6	4
1	6	6	6	7	7	7	7	6	5	7	5	5	6	5	6	6	5	7	5	5	5	6	4	5	6	5	5	6	6	7	7	6	7	6	4
1	6	6	6	7	7	7	7	6	5	7	5	5	6	5	6	6	5	7	5	5	5	6	4	5	6	5	5	6	6	7	7	6	7	6	4
1	6	6	6	7	7	7	7	6	5	7	5	5	6	5	6	6	5	7	5	5	5	6	4	5	6	5	5	6	6	7	7	6	7	6	4
2	5	5	5	5	5	5	5	6	5	4	5	5	5	6	6	6	6	6	6	6	5	3	3	3	3	2	2	5	5	4	5	5	5	5	5
1	4	7	7	5	5	5	6	7	7	5	6	7	7	7	6	5	6	7	5	5	7	5	6	7	6	7	7	7	7	7	7	6	7	4	7
1	4	7	7	5	5	5	6	7	7	5	6	7	7	7	6	5	6	7	5	5	7	5	6	7	6	7	7	7	7	7	7	6	7	4	7
1	4	7	7	5	5	5	6	7	7	5	6	7	7	7	6	5	6	7	5	5	7	5	6	7	6	7	7	7	7	7	7	6	7	4	7
2	7	7	7	5	6	6	6	5	6	5	4	6	7	5	5	5	5	6	7	7	7	7	7	5	7	7	7	7	7	7	7	7	7	7	6
1	7	5	6	7	5	6	4	5	6	6	6	5	7	5	4	6	7	4	7	7	5	7	6	7	7	6	7	7	7	7	7	6	6	7	6
1	7	5	6	7	5	6	4	5	6	6	6	5	7	5	4	6	7	4	7	7	5	7	6	7	7	6	7	7	7	7	7	6	6	7	6
1	4	4	6	7	7	7	6	7	5	6	6	6	7	6	6	7	6	5	5	5	6	6	6	5	7	5	5	6	6	7	7	6	5	5	4
1	4	4	6	7	7	7	6	7	5	6	6	6	7	6	6	7	6	5	5	5	6	6	6	5	7	5	5	6	6	7	7	6	5	5	4
1	4	4	6	7	7	7	6	7	5	6	6	6	7	6	6	7	6	5	5	5	6	6	6	5	7	5	5	6	6	7	7	6	5	5	4
2	4	5	3	4	6	4	6	5	7	4	7	6	4	5	5	3	5	4	6	6	6	6	6	4	4	4	4	6	5	7	4	5	4	4	4
1	5	7	7	7	7	6	7	6	7	7	6	5	6	7	7	6	6	5	4	4	4	6	7	7	6	7	7	7	7	7	6	7	6	4	4
1	5	7	7	7	7	6	7	6	7	7	6	5	6	7	7	6	6	5	4	4	4	6	7	7	6	7	7	7	7	7	6	7	6	4	4
1	5	7	7	7	7	6	7	6	7	7	6	5	6	7	7	6	6	5	4	4	4	6	7	7	6	7	7	7	7	7	6	7	6	4	4
1	7	6	5	5	5	5	3	7	4	4	5	5	4	4	4	4	5	6	5	5	5	6	5	5	6	6	5	5	6	7	6	6	4	6	7
1	7	7	6	7	7	7	6	4	7	7	5	7	7	4	7	6	6	4	7	7	7	6	5	4	7	6	7	6	6	7	7	6	4	6	6
1	7	7	6	7	7	7	6	4	7	7	5	7	7	4	7	6	6	4	7	7	7	6	5	4	7	6	7	6	6	7	7	6	4	6	6
1	7	7	6	7	7	7	6	4	7	7	5	7	7	4	7	6	6	4	7	7	7	6	5	4	7	6	7	6	6	7	7	6	4	6	6
2	6	6	2	2	3	2	2	3	3	3	5	2	3	6	7	3	5	7	6	6	5	3	3	5	5	5	5	5	5	5	4	4	3	3	4
1	6	5	7	6	7	6	6	7	7	4	7	7	6	6	6	6	6	6	6	6	6	6	5	4	6	6	6	7	7	6	6	4	4	6	6
2	5	5	3	3	2	2	3	3	3	3	2	2	2	2	2	2	2	3	4	4	3	3	3	4	2	3	4	5	3	5	4	4	3	5	3
1	6	6	5	6	6	5	5	5	5	6	5	5	5	5	3	5	5	5	4	4	3	4	3	3	5	4	4	5	5	6	5	4	3	6	6
1	7	5	6	7	5	6	4	5	6	6	6	5	7	5	4	6	7	4	7	7	5	7	6	7	7	6	7	7	7	7	7	6	6	7	6
1	7	5	6	7	5	6	4	5	6	6	6	5	7	5	4	6	7	4	7	7	5	7	6	7	7	6	7	7	7	7	7	6	6	7	6
1	7	5	6	7	5	6	4	5	6	6	6	5	7	5	4	6	7	4	7	7	5	7	6	7	7	6	7	7	7	7	7	6	6	7	6
1	7	5	6	7	5	6	4	5	6	6	6	5	7	5	4	6	7	4	7	7	5	7	6	7	7	6	7	7	7	7	7	6	6	7	6
1	7	5	6	7	5	6	4	5	6	6	6	5	7	5	4	6	7	4	7	7	5	7	6	7	7	6	7	7	7	7	7	6	6	7	6
1	7	5	6	7	5	6	4	5	6	6	6	5	7	5	4	6	7	4	7	7	5	7	6	7	7	6	7	7	7	7	7	6	6	7	6
1	7	5	6	7	5	6	4	5	6	6	6	5	7	5	4	6	7	4	7	7	5	7	6	7	7	6	7	7	7	7	7	6	6	7	6
1	7	5	6	7	5	6	4	5	6	6	6	5	7	5	4	6	7	4	7	7	5	7	6	7	7	6	7	7	7	7	7	6	6	7	6
1	7	5	6	7	5	6	4	5	6	6	6	5	7	5	4	6	7	4	7	7	5	7	6	7	7	6	7	7	7	7	7	6	6	7	6
1	7	5	6	7	5	6	4	5	6	6	6	5	7	5	4	6	7	4	7	7	5	7	6	7	7	6	7	7	7	7	7	6	6	7	6
1	7	5	6	7	5	6	4	5	6	6	6	5	7	5	4	6	7	4	7	7	5	7	6	7	7	6	7	7	7	7	7	6	6	7	6
1	7	5	6	7	5	6	4	5	6	6	6	5	7	5	4	6	7	4	7	7	5	7	6	7	7	6	7	7	7	7	7	6	6	7	6
1	7	5	6	7	5	6	4	5	6	6	6	5	7	5	4	6	7	4	7	7	5	7	6	7	7	6	7	7	7	7	7	6	6	7	6
1	7	5	6	7	5	6	4	5	6	6	6	5	7	5	4	6	7	4	7	7	5	7	6	7	7	6	7	7	7	7	7	6	6	7	6
1	7	5	6	7	5	6	4	5	6	6	6	5	7	5	4	6	7	4	7	7	5	7	6	7	7	6	7	7	7	7	7	6	6	7	6
1	7	5	6	7	5	6	4	5	6	6	6	5	7	5	4	6	7	4	7	7	5	7	6	7	7	6	7	7	7	7	7	6	6	7	6
1	5	3	2	4	3	3	5	4	4	5	5	5	5	3	5	2	2	3	3	3	2	3	3	3	4	5	5	5	6	6	6	6	6	6	4
1	5	3	2	4	3	3	5	4	4	5	5	5	5	3	5	2	2	3	3	3	2	3	3	3	4	5	5	5	6	6	6	6	6	6	4
1	5	3	2	4	3	3	5	4	4	5	5	5	5	3	5	2	2	3	3	3	2	3	3	3	4	5	5	5	6	6	6	6	6	6	4
1	5	5	3	3	3	5	3	4	4	2	2	2	3	4	6	4	3	2	7	7	5	2	4	5	2	4	6	6	5	3	5	4	4	4	4
1	5	5	3	3	3	5	3	4	4	2	2	2	3	4	6	4	3	2	7	7	5	2	4	5	2	4	6	6	5	3	5	4	4	4	4
2	5	3	1	5	1	2	4	4	5	4	1	1	1	2	1	1	2	7	2	2	1	2	2	3	2	2	5	7	1	2	4	2	2	2	5
2	4	5	3	4	4	4	4	6	6	4	6	6	6	4	4	6	4	5	5	5	5	6	4	6	4	3	5	3	6	5	5	6	6	6	6
1	6	6	7	7	7	6	7	5	5	6	7	7	4	7	5	6	7	7	6	6	7	5	5	5	7	6	6	7	6	7	7	6	7	5	7
1	6	6	7	7	7	6	7	5	5	6	7	7	4	7	5	6	7	7	6	6	7	5	5	5	7	6	6	7	6	7	7	6	7	5	7
1	6	6	7	7	7	6	7	5	5	6	7	7	4	7	5	6	7	7	6	6	7	5	5	5	7	6	6	7	6	7	7	6	7	5	7
1	7	7	6	5	7	5	4	6	7	7	4	7	6	4	4	7	7	6	5	5	5	6	6	7	7	6	5	7	6	7	7	4	6	6	7
1	7	7	6	5	7	5	4	6	7	7	4	7	6	4	4	7	7	6	5	5	5	6	6	7	7	6	5	7	6	7	7	4	6	6	7
1	7	7	6	5	7	5	4	6	7	7	4	7	6	4	4	7	7	6	5	5	5	6	6	7	7	6	5	7	6	7	7	4	6	6	7
2	5	5	4	4	5	5	5	4	3	5	6	6	5	6	6	6	5	7	5	5	3	5	5	3	3	5	3	6	5	5	5	5	5	5	5
1	6	5	5	4	3	3	3	5	7	3	4	4	2	4	4	5	4	4	6	6	5	3	2	3	3	3	5	6	6	7	4	4	3	3	4
1	6	5	5	4	3	3	3	5	7	3	4	4	2	4	4	5	4	4	6	6	6	3	2	3	4	2	4	6	6	7	4	4	3	3	4
1	6	6	4	6	4	4	6	4	4	4	6	4	4	4	4	4	4	2	4	4	4	4	4	4	4	4	4	4	6	6	3	5	5	6	4
2	6	6	2	2	3	2	2	3	4	3	3	2	2	6	6	2	5	7	6	6	5	3	3	5	5	4	5	5	5	5	4	4	4	4	4
1	5	7	7	7	6	6	5	6	5	6	6	6	6	5	5	3	6	6	6	6	5	6	5	6	6	6	6	6	6	4	6	6	6	6	6
2	3	4	5	3	4	5	6	6	5	6	5	5	6	5	5	3	5	3	6	6	6	4	5	3	6	4	5	5	6	3	4	6	3	5	5
1	5	6	2	5	1	1	3	7	7	7	5	6	5	5	6	5	5	6	7	7	1	5	3	7	6	7	6	7	5	7	7	7	7	6	7
1	7	7	6	6	7	7	7	5	7	7	6	6	5	7	6	7	6	6	6	6	6	7	6	5	7	6	6	6	6	7	6	7	7	4	4
1	7	7	6	6	7	7	7	5	7	7	6	6	5	7	6	7	6	6	6	6	6	7	6	5	7	6	6	6	6	7	6	7	7	4	4
1	7	7	6	6	7	7	7	5	7	7	6	6	5	7	6	7	6	6	6	6	6	7	6	5	7	6	6	6	6	7	6	7	7	4	4
1	6	6	4	4	6	5	6	4	7	3	3	3	3	4	4	3	5	5	4	4	5	4	3	3	4	4	5	6	6	7	6	5	5	6	4
2	7	7	7	2	3	3	2	5	5	3	3	5	5	1	1	1	1	5	2	2	1	3	2	4	5	4	5	7	3	6	7	7	7	6	5
1	5	5	1	1	2	4	4	4	4	2	2	2	1	4	6	2	2	2	7	7	5	2	4	4	2	4	6	6	5	2	4	4	4	4	4
1	5	6	6	4	6	6	6	4	4	7	5	5	5	7	5	5	5	7	7	7	7	4	4	7	6	5	6	6	6	6	6	7	4	7	4
1	5	6	6	4	6	6	6	4	4	7	5	5	5	7	5	5	5	7	7	7	7	4	4	7	6	5	6	6	6	6	6	7	4	7	4
1	5	6	6	4	6	6	6	4	4	7	5	5	5	7	5	5	5	7	7	7	7	4	4	7	6	5	6	6	6	6	6	7	4	7	4
1	5	2	2	6	3	4	4	4	2	6	2	7	6	3	3	2	3	6	4	4	2	3	2	1	3	7	4	6	4	1	4	4	4	6	4
2	7	6	7	6	6	7	6	4	5	6	6	6	7	7	7	7	7	6	7	7	7	5	3	1	7	7	7	4	4	4	1	4	3	2	1
1	1	2	3	2	1	2	2	3	5	6	5	5	3	5	3	3	3	3	1	1	3	6	4	3	2	2	1	2	2	5	5	5	5	5	5
1	4	4	4	4	4	4	5	4	6	4	4	4	4	4	4	4	4	4	4	4	1	4	4	5	4	4	5	4	4	4	4	4	4	1	4
2	5	5	6	5	5	6	6	5	5	5	5	5	5	5	6	3	3	5	5	5	6	6	4	6	3	3	5	5	5	5	5	5	5	5	5
1	4	5	5	6	4	5	4	5	4	3	6	4	5	5	4	6	4	5	4	4	5	6	6	5	4	2	2	6	6	7	7	4	6	4	5
1	7	6	6	6	7	7	5	7	7	6	6	5	4	7	6	6	6	6	5	5	5	6	4	4	5	5	6	7	6	4	5	7	6	7	4
1	6	4	4	4	6	6	6	6	3	3	2	3	3	6	6	6	6	6	4	4	5	6	6	6	4	4	4	5	5	6	6	6	5	5	4
1	6	6	7	5	5	6	7	5	5	6	6	7	4	4	4	6	6	7	6	6	7	6	5	4	4	6	5	7	6	6	6	4	4	6	3
1	5	5	4	3	7	5	7	5	6	5	4	5	5	4	4	3	3	6	6	6	3	5	5	5	6	5	6	5	5	5	5	7	6	6	5
1	6	6	5	5	6	6	5	6	7	6	5	5	6	6	6	6	6	5	6	6	5	5	5	5	4	4	4	6	4	6	6	6	5	5	5
1	6	6	5	5	3	4	4	5	5	4	4	3	3	2	2	6	2	3	3	3	2	3	3	3	3	3	4	5	5	6	6	3	3	5	6
1	6	4	5	2	5	2	3	4	4	5	3	3	3	6	6	2	4	6	4	4	4	4	4	4	2	4	4	4	4	7	7	7	4	6	4
1	6	7	5	5	5	5	4	4	4	6	4	4	5	4	2	4	4	5	4	4	2	4	2	2	4	3	3	4	4	6	4	2	1	2	4
1	7	5	5	5	6	6	4	3	7	2	5	4	3	4	3	5	4	5	5	5	4	3	3	5	4	5	4	5	6	6	6	4	4	5	6
2	6	6	2	1	4	2	2	3	1	5	4	4	3	3	1	1	5	7	7	7	5	3	3	4	5	4	4	2	6	5	4	4	4	4	4
2	6	5	1	1	4	1	2	4	4	4	4	5	4	5	5	4	4	7	7	7	5	4	1	1	5	4	4	6	5	4	4	4	4	4	4
1	4	4	3	4	5	4	3	4	3	4	3	4	3	5	3	6	7	3	3	3	2	5	3	1	3	3	4	3	2	2	3	6	7	3	3
1	4	4	3	4	5	4	3	4	3	4	3	4	3	5	3	6	7	3	3	3	2	5	3	1	3	3	4	3	2	2	3	6	7	3	3
1	5	5	5	5	6	3	5	4	5	4	4	4	4	6	6	6	6	5	5	5	5	4	4	4	6	4	4	6	5	6	6	5	5	4	4
2	6	6	5	3	2	5	7	7	6	7	5	4	3	7	4	2	5	3	1	1	5	2	6	5	1	5	6	1	3	7	6	2	4	3	4
2	6	4	6	5	3	7	4	6	2	7	2	3	2	2	4	7	3	5	2	2	6	2	4	5	2	3	4	7	6	5	6	3	2	4	3
1	2	3	1	2	6	2	1	4	5	2	2	2	2	1	2	1	1	1	1	1	2	2	2	2	2	2	2	2	2	6	4	5	5	5	4
1	7	7	7	5	7	6	5	4	5	1	3	7	1	7	7	7	7	6	5	5	5	1	1	5	1	1	7	3	5	7	7	7	4	4	4
1	7	6	6	7	6	6	6	6	7	2	7	6	5	6	5	3	5	5	3	3	3	2	2	6	4	5	5	5	5	6	5	6	2	3	3
1	6	2	2	6	2	3	1	4	4	4	2	2	4	6	6	3	3	6	6	6	2	4	4	4	4	4	4	6	6	7	6	7	3	3	6
1	3	2	1	1	2	1	2	4	5	2	2	1	2	1	1	1	2	1	3	3	1	2	2	4	1	1	1	1	4	5	4	6	6	5	4
1	3	1	1	4	2	1	2	4	7	1	2	1	1	1	1	1	1	1	3	3	1	2	2	4	1	1	1	1	4	5	4	6	6	5	4
1	5	5	2	1	3	3	1	4	4	6	2	1	1	4	4	3	2	5	5	5	1	3	4	5	5	5	1	6	6	5	5	6	6	5	4
1	3	1	1	2	4	3	1	4	5	1	1	1	1	3	2	1	2	3	1	1	3	3	1	1	3	6	6	3	2	4	3	4	5	4	6
1	7	7	5	5	7	6	6	5	5	5	5	2	2	3	3	7	7	2	5	5	4	3	3	4	5	5	5	7	7	4	4	2	2	2	4
1	7	7	5	5	7	6	6	5	5	5	5	2	2	3	3	7	7	2	5	5	4	3	3	4	5	5	5	7	7	4	4	2	2	2	4
1	6	7	6	5	6	6	6	6	6	3	3	5	6	6	5	6	6	5	5	5	6	6	6	7	6	5	6	7	6	2	7	6	6	6	6
1	5	5	4	5	4	4	5	4	4	6	4	5	6	4	4	5	4	4	5	5	2	6	5	4	6	6	6	4	4	7	6	7	5	6	5
2	6	5	4	2	5	5	3	6	7	6	3	7	2	7	3	6	5	2	2	2	7	7	6	5	1	5	6	1	2	6	7	3	5	7	2
2	6	5	3	2	3	5	7	7	6	7	5	4	3	7	4	2	5	2	1	1	7	7	6	5	1	5	6	1	3	7	6	1	2	3	4
1	4	1	3	2	7	6	5	1	2	6	5	4	2	1	2	4	5	3	2	2	1	3	4	5	1	5	7	3	2	7	1	2	5	6	4
1	1	2	1	4	2	7	1	7	4	4	4	7	4	1	2	1	1	4	4	4	1	4	4	4	7	4	4	2	1	1	4	7	7	7	4
1	2	2	3	5	2	2	1	5	5	1	1	1	1	2	2	2	1	2	1	1	1	2	2	2	2	2	2	4	6	7	7	7	6	6	6
